# Supplementary material
Source: Research Square preprint supplement (doi:10.21203/rs.3.rs-9517014/v1)
Supplement: Supplementary file 1 [file 5c32c6da29966ffcd3f7ba9b.docx]

***Supplementary Materials***

**Integrated transcriptomic and proteomic analyses reveal luteolin suppresses triple-negative breast cancer through fatty acid β-oxidation activation and oncogenic signaling inhibition**

Because some target proteins showed electrophoretic positions close to that of GAPDH, sequential Western blot detection procedure was used to avoid signal overlap and ensure reliable band assignment. After the first round of antibody incubation and signal development, the membrane was treated with 0.2 M NaOH for 15 min, washed with PBS four times for 8 min each, re-blocked, and then subjected to subsequent antibody incubation and detection.

In some cases, the technical replicate blots showed variation in band quality or signal consistency. Therefore, our assessment of the results was based mainly on the consistency and reproducibility observed across independent biological replicates.

**
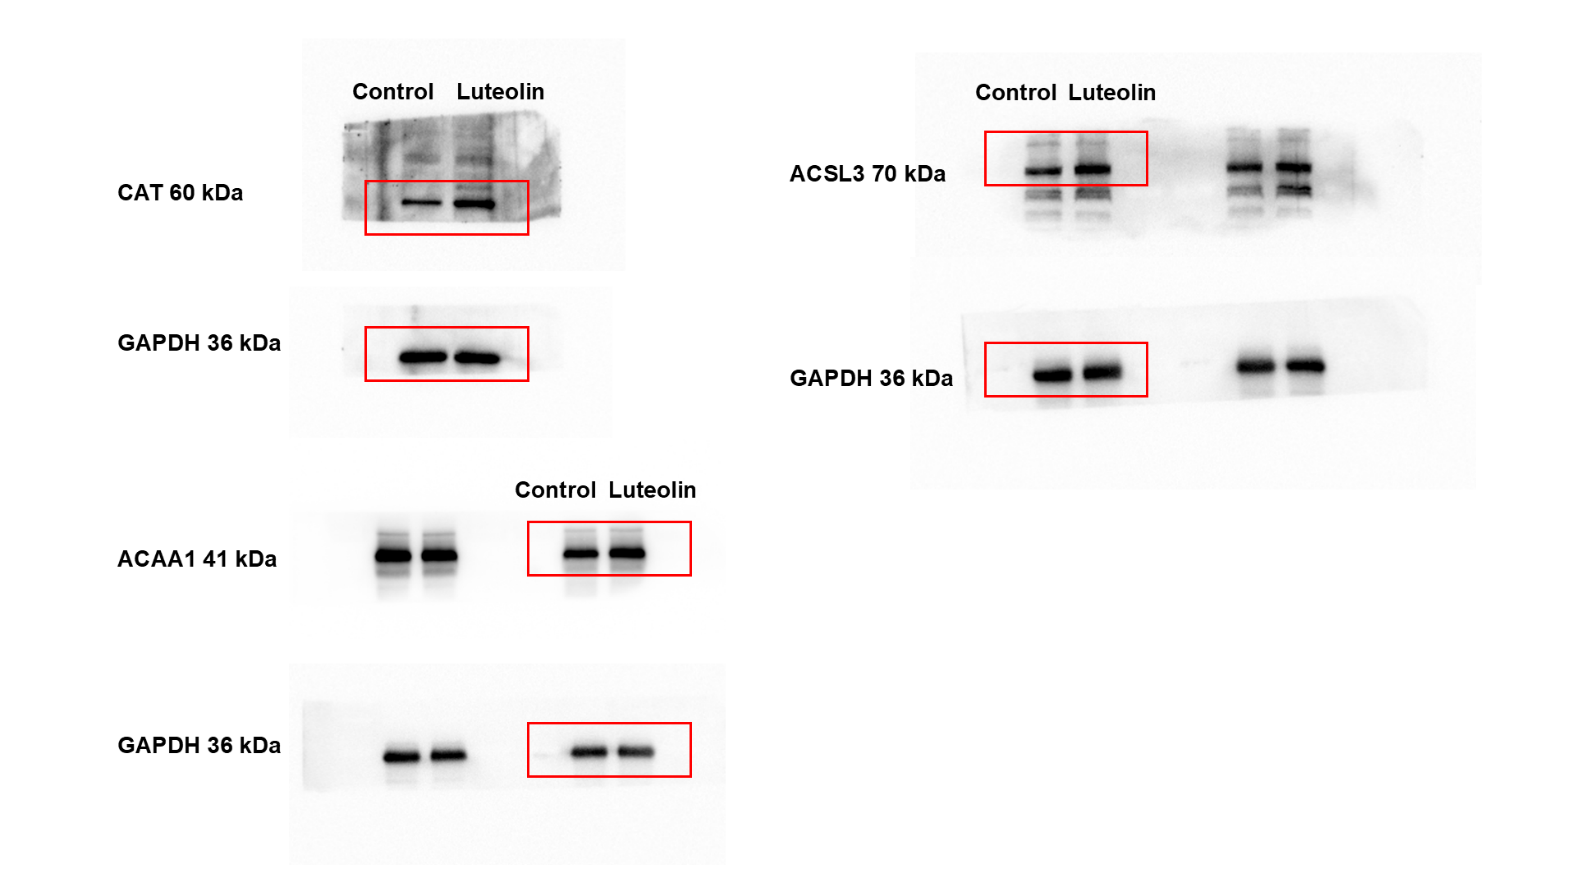
**

**Figure S1** Representative Western blot images of CAT, ACAA1, ACSL3 and GAPDH in the control and luteolin groups.

**
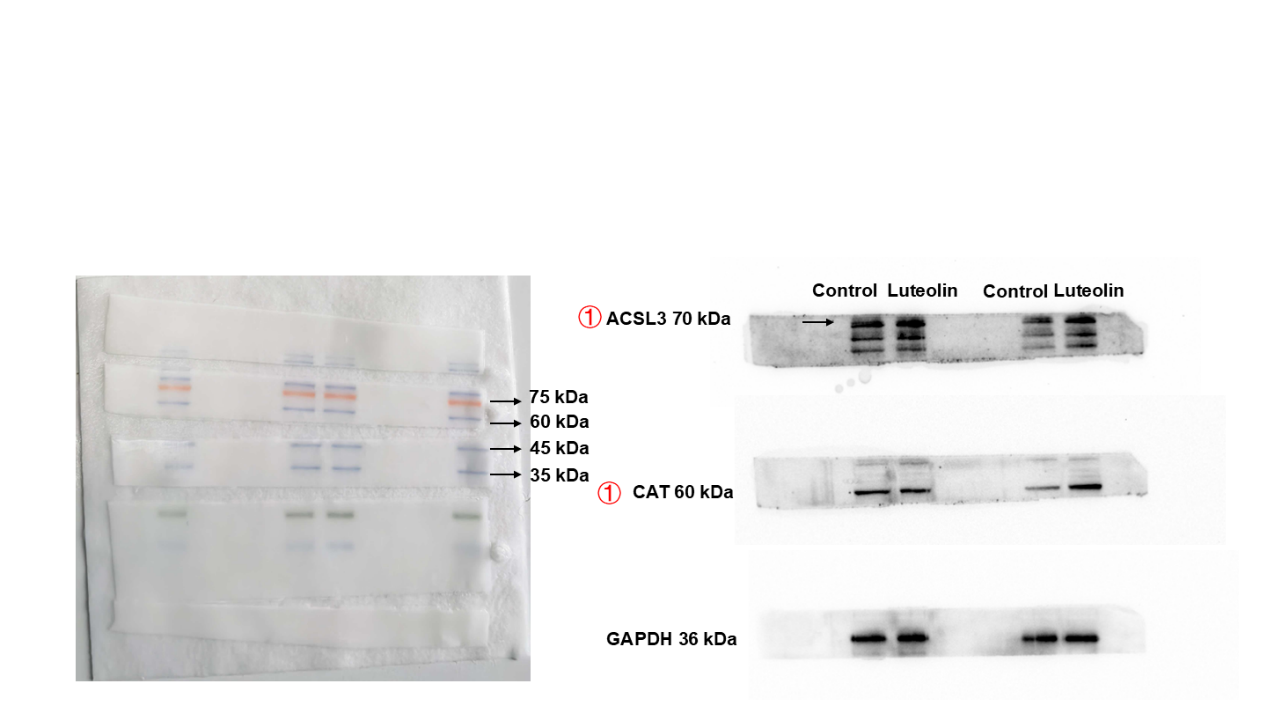
**

**Figure S2** Uncropped Western blot images of ACSL3, CAT, and GAPDH

**
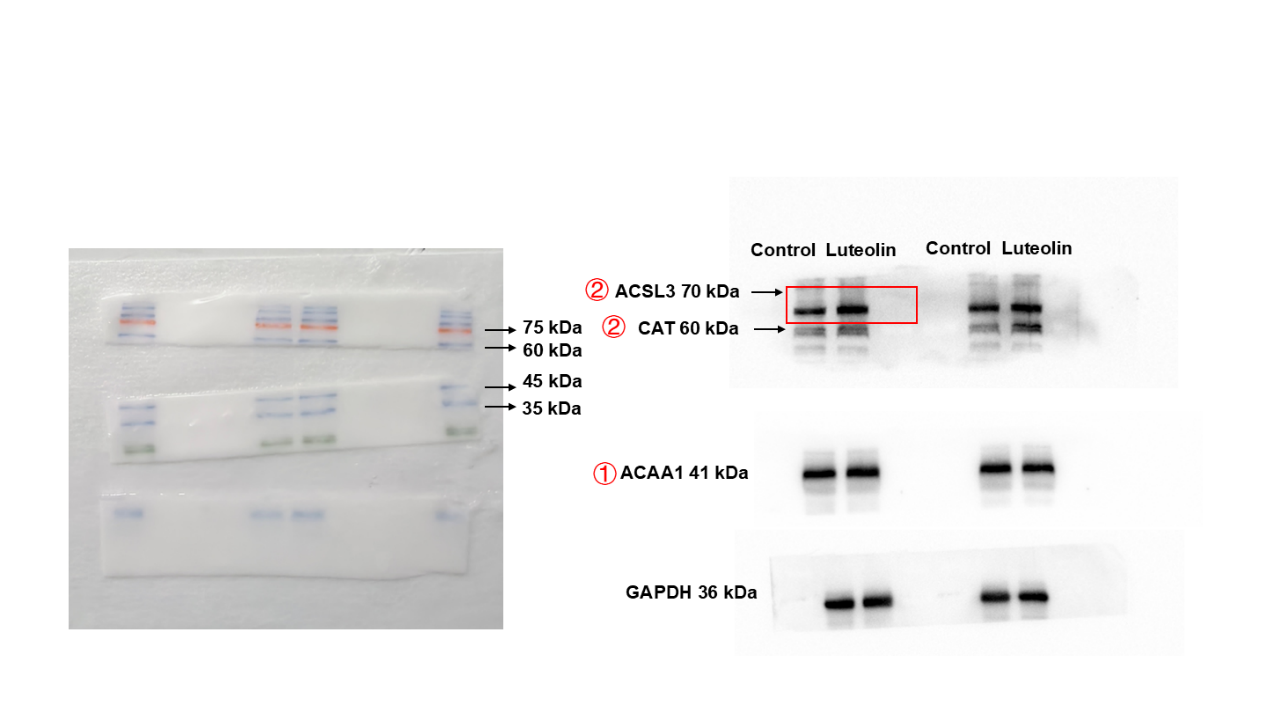
**

**Figure S3** Uncropped Western blot images of ACSL3, CAT, ACAA1 and GAPDH

**
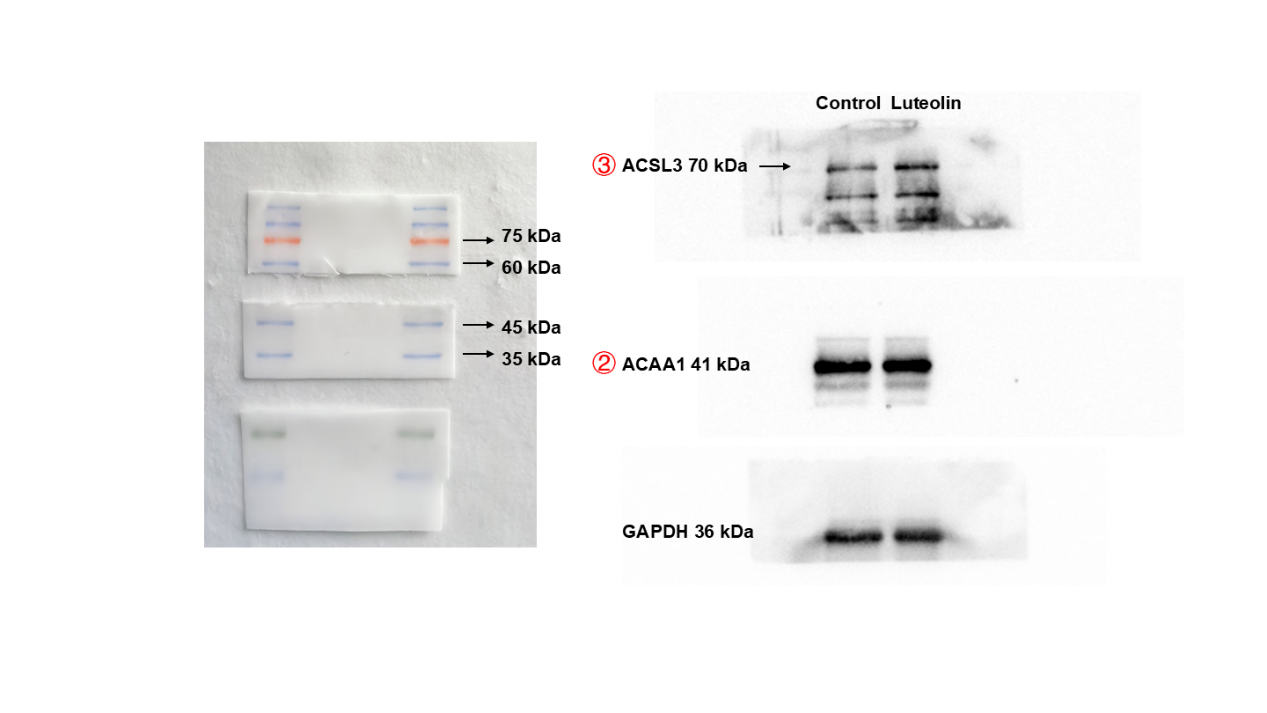
**

**Figure S4** Uncropped Western blot images of ACSL3, ACAA1, and GAPDH

**
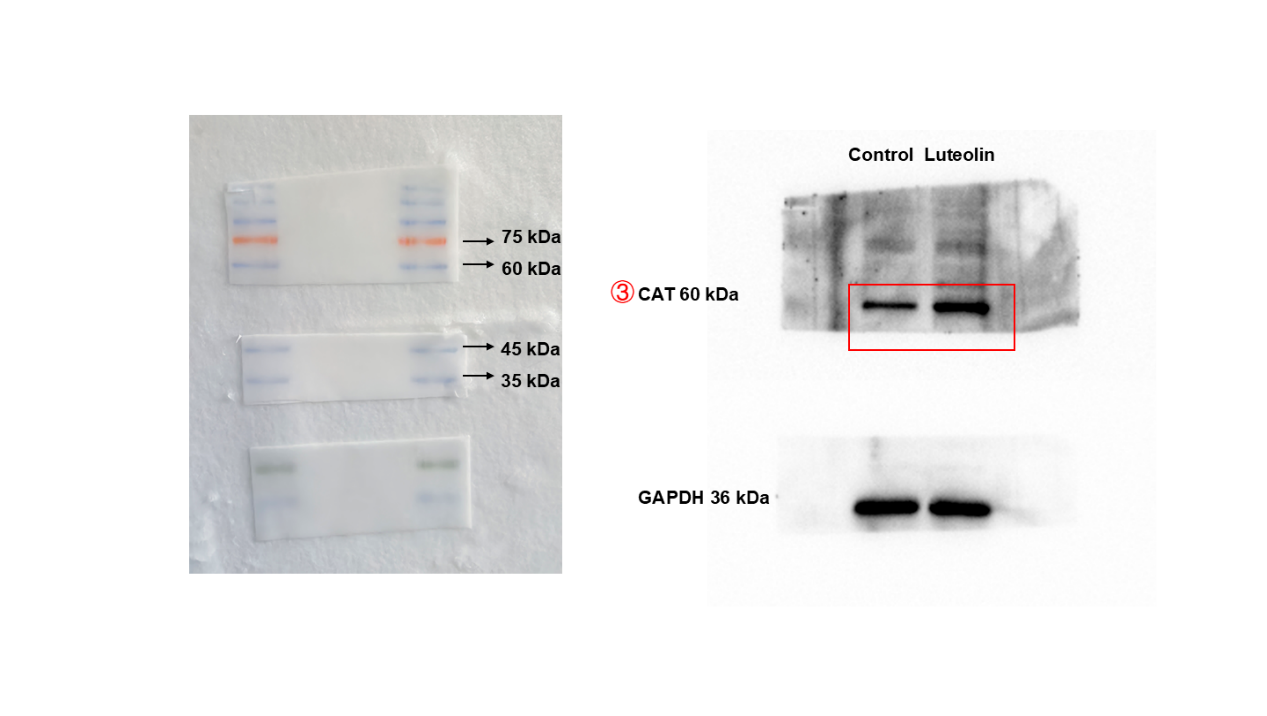
**

**Figure S5** Uncropped Western blot images of CAT and GAPDH

**
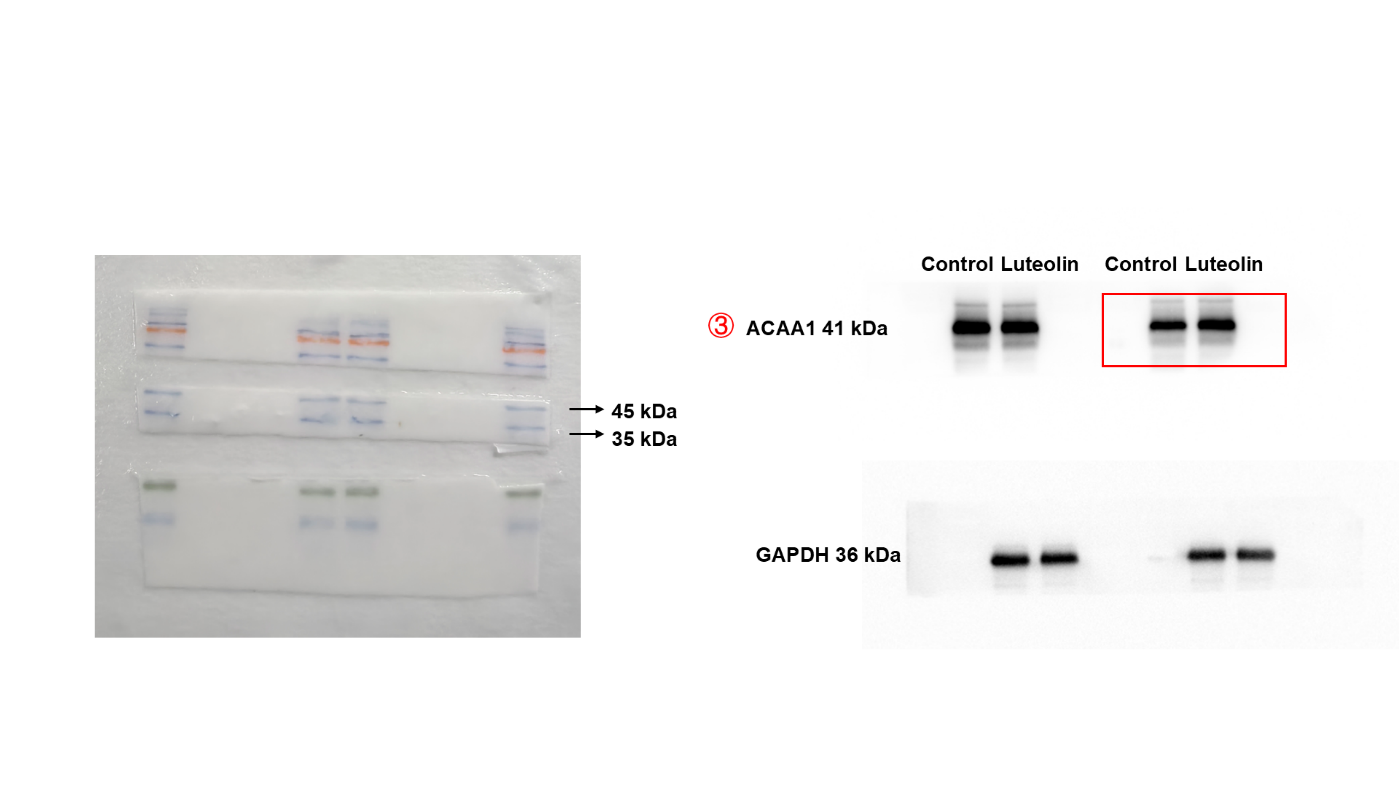
**

**Figure S6** Uncropped Western blot images of ACAA1 and GAPDH

Legend: Red circled numbers indicate the biological replicate number, and red rectangles mark the bands used in the manuscript figures.

**Table S1** Transcriptomic profiling - quality analysis of sequencing data

| Sample | Raw Reads | Clean Reads | Error Rate (%) | Q20 (%) | Q30 (%) | GC Content (%) |
| --- | --- | --- | --- | --- | --- | --- |
| C1 | 71229904 | 65849530 | 0.01 | 99.19 | 96.22 | 50.56 |
| C2 | 52485802 | 47172390 | 0.01 | 99.14 | 95.85 | 51.43 |
| C3 | 49860700 | 45965428 | 0.01 | 99.16 | 96.08 | 51.86 |
| C4 | 60165610 | 56585688 | 0.01 | 99.18 | 96.13 | 50.86 |
| L1 | 59995976 | 54925818 | 0.01 | 99.19 | 96.23 | 51.14 |
| L2 | 55660584 | 51834532 | 0.01 | 99.18 | 96.13 | 51.53 |
| L3 | 59877034 | 55410490 | 0.01 | 99.17 | 96.04 | 51.38 |
| L4 | 68832124 | 63878340 | 0.01 | 99.21 | 96.27 | 50.70 |

Q20 and Q30 represent the percentage of bases with a Phred quality score ≥ 20 and ≥ 30, respectively. Raw reads were processed with fastp to obtain clean reads, which were aligned to the human reference genome using HISAT2. C = control group; L = low dose luteolin-treated group

**Table S2** The differentially expressed genes in luteolin-treated MDA-MB-231 cells versus control group

| NO. | Gene ID | Gene name | Log2 Fold Change | *p*-value | padj | Regulated |
| --- | --- | --- | --- | --- | --- | --- |
| 1 | ENSG00000138061 | CYP1B1 | -2.52670 | 2.6E-247 | 3.9E-243 | down |
| 2 | ENSG00000138131 | LOXL4 | -1.94795 | 3.7E-134 | 2.8E-130 | down |
| 3 | ENSG00000103888 | CEMIP | -2.62054 | 2.6E-128 | 1.3E-124 | down |
| 4 | ENSG00000162591 | MEGF6 | -1.42213 | 1.9E-117 | 7E-114 | down |
| 5 | ENSG00000138166 | DUSP5 | 1.05790 | 5.4E-69 | 1.63E-65 | up |
| 6 | ENSG00000124813 | RUNX2 | -1.14737 | 1.07E-67 | 2.71E-64 | down |
| 7 | ENSG00000148346 | LCN2 | -1.47658 | 1.76E-67 | 3.8E-64 | down |
| 8 | ENSG00000156804 | FBXO32 | -1.05057 | 4.03E-64 | 6.76E-61 | down |
| 9 | ENSG00000180730 | SHISA2 | -1.12683 | 1.16E-58 | 1.6E-55 | down |
| 10 | ENSG00000163734 | CXCL3 | 1.10971 | 1.76E-58 | 2.22E-55 | up |
| 11 | ENSG00000184371 | CSF1 | -1.04491 | 9.92E-56 | 1.07E-52 | down |
| 12 | ENSG00000168874 | ATOH8 | -1.81129 | 4.09E-55 | 4.12E-52 | down |
| 13 | ENSG00000166106 | ADAMTS15 | -1.02255 | 1.02E-49 | 9.62E-47 | down |
| 14 | ENSG00000186340 | THBS2 | -1.23978 | 1.49E-48 | 1.33E-45 | down |
| 15 | ENSG00000140465 | CYP1A1 | -2.96561 | 1.78E-42 | 1.42E-39 | down |
| 16 | ENSG00000197632 | SERPINB2 | -1.86120 | 9.48E-42 | 7.16E-39 | down |
| 17 | ENSG00000134955 | SLC37A2 | -1.03684 | 1.88E-40 | 1.29E-37 | down |
| 18 | ENSG00000114812 | VIPR1 | -2.83773 | 1.18E-37 | 6.39E-35 | down |
| 19 | ENSG00000134339 | SAA2 | -1.09529 | 1.18E-37 | 6.39E-35 | down |
| 20 | ENSG00000103257 | SLC7A5 | -1.09999 | 3.35E-37 | 1.75E-34 | down |
| 21 | ENSG00000165272 | AQP3 | -1.43271 | 5.2E-34 | 2.53E-31 | down |
| 22 | ENSG00000163435 | ELF3 | -1.20769 | 6.6E-34 | 3.12E-31 | down |
| 23 | ENSG00000118898 | PPL | -1.30458 | 1.43E-30 | 5.53E-28 | down |
| 24 | ENSG00000136859 | ANGPTL2 | -1.13199 | 2.68E-27 | 8.63E-25 | down |
| 25 | ENSG00000143603 | KCNN3 | -1.02046 | 3.6E-27 | 1.13E-24 | down |
| 26 | ENSG00000128510 | CPA4 | -1.00196 | 7.42E-27 | 2.24E-24 | down |
| 27 | ENSG00000077942 | FBLN1 | -1.06670 | 2.47E-26 | 7.18E-24 | down |
| 28 | ENSG00000150556 | LYPD6B | -1.14987 | 9.2E-22 | 1.99E-19 | down |
| 29 | ENSG00000171631 | P2RY6 | -1.51630 | 1.55E-20 | 3.05E-18 | down |
| 30 | ENSG00000042062 | RIPOR3 | -1.29421 | 5.03E-18 | 7.69E-16 | down |
| 31 | ENSG00000169583 | CLIC3 | -1.27136 | 9.57E-17 | 1.31E-14 | down |
| 32 | ENSG00000039068 | CDH1 | -2.24654 | 4.46E-16 | 5.71E-14 | down |
| 33 | ENSG00000121454 | LHX4 | -1.09524 | 5.92E-16 | 7.46E-14 | down |
| 34 | ENSG00000243649 | CFB | -1.13351 | 1.64E-15 | 2E-13 | down |
| 35 | ENSG00000128422 | KRT17 | -1.68251 | 2.06E-15 | 2.49E-13 | down |
| 36 | ENSG00000068078 | FGFR3 | -1.09751 | 3.43E-15 | 4.08E-13 | down |
| 37 | ENSG00000019186 | CYP24A1 | -1.67789 | 4.67E-15 | 5.47E-13 | down |
| 38 | ENSG00000023171 | GRAMD1B | 1.21554 | 6.36E-15 | 7.28E-13 | up |
| 39 | ENSG00000154165 | GPR15 | -2.12838 | 1.35E-14 | 1.47E-12 | down |
| 40 | ENSG00000265190 | ANXA8 | -1.11951 | 5.73E-13 | 5.03E-11 | down |
| 41 | ENSG00000138395 | CDK15 | -1.53381 | 1.14E-12 | 9.87E-11 | down |
| 42 | ENSG00000261888 | ENSG00000261888 | -2.81952 | 1E-11 | 7.81E-10 | down |
| 43 | ENSG00000168140 | VASN | -1.01781 | 8.83E-11 | 6.27E-09 | down |
| 44 | ENSG00000211448 | DIO2 | -1.25735 | 1.06E-10 | 7.4E-09 | down |
| 45 | ENSG00000142583 | SLC2A5 | -2.28582 | 1.21E-10 | 8.28E-09 | down |
| 46 | ENSG00000137868 | STRA6 | -1.96034 | 1.59E-10 | 1.06E-08 | down |
| 47 | ENSG00000005102 | MEOX1 | -1.58462 | 4.08E-10 | 2.59E-08 | down |
| 48 | ENSG00000277758 | SYT15B | -1.22659 | 6.96E-10 | 4.21E-08 | down |
| 49 | ENSG00000248839 | ENSG00000248839 | -2.57765 | 1.07E-09 | 6.25E-08 | down |
| 50 | ENSG00000103196 | CRISPLD2 | -1.06994 | 1.29E-09 | 7.4E-08 | down |
| 51 | ENSG00000116774 | OLFML3 | -1.26605 | 2.88E-09 | 1.57E-07 | down |
| 52 | ENSG00000171051 | FPR1 | -1.13644 | 5.14E-09 | 2.69E-07 | down |
| 53 | ENSG00000148735 | PLEKHS1 | -1.84113 | 6.57E-09 | 3.35E-07 | down |
| 54 | ENSG00000009950 | MLXIPL | -1.24782 | 7.21E-09 | 3.66E-07 | down |
| 55 | ENSG00000104081 | BMF | -1.53768 | 1.09E-08 | 5.35E-07 | down |
| 56 | ENSG00000057657 | PRDM1 | -1.42728 | 1.1E-08 | 5.38E-07 | down |
| 57 | ENSG00000174206 | KICS2 | 1.03993 | 1.46E-08 | 6.94E-07 | up |
| 58 | ENSG00000134259 | NGF | -1.13363 | 2.37E-08 | 1.07E-06 | down |
| 59 | ENSG00000100302 | RASD2 | -1.68192 | 2.45E-08 | 1.1E-06 | down |
| 60 | ENSG00000273760 | ENSG00000273760 | -1.78526 | 3.99E-08 | 1.7E-06 | down |
| 61 | ENSG00000271857 | ENSG00000271857 | -1.47600 | 4.6E-08 | 1.92E-06 | down |
| 62 | ENSG00000232973 | CYP1B1-AS1 | -1.47527 | 4.84E-08 | 2.02E-06 | down |
| 63 | ENSG00000276850 | ENSG00000276850 | -1.37560 | 1E-07 | 3.91E-06 | down |
| 64 | ENSG00000139292 | LGR5 | -1.27090 | 2.99E-07 | 1.08E-05 | down |
| 65 | ENSG00000123405 | NFE2 | -2.20118 | 4.65E-07 | 1.6E-05 | down |
| 66 | ENSG00000064205 | CCN5 | -2.45472 | 6.25E-07 | 2.08E-05 | down |
| 67 | ENSG00000291194 | ENSG00000291194 | -1.16780 | 6.96E-07 | 2.29E-05 | down |
| 68 | ENSG00000181634 | TNFSF15 | 1.36653 | 7.96E-07 | 2.57E-05 | up |
| 69 | ENSG00000177181 | RIMKLA | 1.01195 | 1.24E-06 | 3.84E-05 | up |
| 70 | ENSG00000125285 | SOX21 | 1.27133 | 1.83E-06 | 5.36E-05 | up |
| 71 | ENSG00000279968 | CCDC28A-AS1 | 1.18279 | 1.84E-06 | 5.38E-05 | up |
| 72 | ENSG00000290966 | KRT87P | -1.01977 | 2.13E-06 | 6.11E-05 | down |
| 73 | ENSG00000137843 | PAK6 | -1.12425 | 3.05E-06 | 8.35E-05 | down |
| 74 | ENSG00000062582 | MRPS24 | -1.06787 | 3.15E-06 | 8.58E-05 | down |
| 75 | ENSG00000198719 | DLL1 | -1.47413 | 3.72E-06 | 9.89E-05 | down |
| 76 | ENSG00000141469 | SLC14A1 | -1.46002 | 5.17E-06 | 0.000131 | down |
| 77 | ENSG00000162383 | SLC1A7 | -1.73045 | 5.55E-06 | 0.000139 | down |
| 78 | ENSG00000230928 | ENSG00000230928 | -2.16629 | 5.66E-06 | 0.000141 | down |
| 79 | ENSG00000166145 | SPINT1 | -1.13502 | 7.13E-06 | 0.000172 | down |
| 80 | ENSG00000188613 | NANOS1 | -1.04534 | 9.47E-06 | 0.000221 | down |
| 81 | ENSG00000171236 | LRG1 | -1.57603 | 1.45E-05 | 0.000327 | down |
| 82 | ENSG00000110195 | FOLR1 | -1.11714 | 1.82E-05 | 0.000397 | down |
| 83 | ENSG00000230303 | ENSG00000230303 | -1.04541 | 2.05E-05 | 0.000438 | down |
| 84 | ENSG00000213030 | CGB8 | -1.52586 | 3.02E-05 | 0.000614 | down |
| 85 | ENSG00000100344 | PNPLA3 | -1.07318 | 4.18E-05 | 0.000805 | down |
| 86 | ENSG00000163395 | IGFN1 | -1.04290 | 4.49E-05 | 0.000852 | down |
| 87 | ENSG00000165181 | SHOC1 | -1.02925 | 4.85E-05 | 0.000909 | down |
| 88 | ENSG00000168453 | HR | -1.01440 | 5.31E-05 | 0.000978 | down |
| 89 | ENSG00000187908 | DMBT1 | 1.18167 | 6.83E-05 | 0.001212 | up |
| 90 | ENSG00000141642 | ELAC1 | 1.00567 | 0.000106 | 0.001757 | up |
| 91 | ENSG00000145113 | MUC4 | -1.46813 | 0.000131 | 0.002077 | down |
| 92 | ENSG00000249306 | LINC01411 | -1.32828 | 0.000162 | 0.002474 | down |
| 93 | ENSG00000168961 | LGALS9 | -1.20680 | 0.000234 | 0.003339 | down |
| 94 | ENSG00000113721 | PDGFRB | -1.16257 | 0.000352 | 0.004653 | down |
| 95 | ENSG00000162892 | IL24 | -1.12548 | 0.000453 | 0.005714 | down |
| 96 | ENSG00000173227 | SYT12 | -1.17996 | 0.000511 | 0.006292 | down |
| 97 | ENSG00000148541 | FAM13C | -1.41310 | 0.000541 | 0.006576 | down |
| 98 | ENSG00000188263 | IL17REL | -1.42192 | 0.000681 | 0.007936 | down |
| 99 | ENSG00000142512 | SIGLEC10 | 1.35263 | 0.000772 | 0.008741 | up |
| 100 | ENSG00000260034 | LCMT1-AS2 | -1.58687 | 0.000898 | 0.009881 | down |
| 101 | ENSG00000153404 | PLEKHG4B | -1.36469 | 0.00122 | 0.012775 | down |
| 102 | ENSG00000115423 | DNAH6 | 1.41657 | 0.001314 | 0.013501 | up |
| 103 | ENSG00000152689 | RASGRP3 | -1.04046 | 0.001538 | 0.015327 | down |
| 104 | ENSG00000253305 | PCDHGB6 | -1.35459 | 0.001547 | 0.015391 | down |
| 105 | ENSG00000109943 | CRTAM | -1.39689 | 0.001601 | 0.015847 | down |
| 106 | ENSG00000239739 | ENSG00000239739 | -1.69698 | 0.001717 | 0.016753 | down |
| 107 | ENSG00000163823 | CCR1 | -1.24905 | 0.001783 | 0.017276 | down |
| 108 | ENSG00000128242 | GAL3ST1 | -1.16674 | 0.001808 | 0.01743 | down |
| 109 | ENSG00000158270 | COLEC12 | -1.43198 | 0.001814 | 0.017442 | down |
| 110 | ENSG00000205609 | EIF3CL | -2.07171 | 0.001816 | 0.01745 | down |
| 111 | ENSG00000281181 | ENSG00000281181 | 3.14954 | 0.001932 | 0.018343 | up |
| 112 | ENSG00000138316 | ADAMTS14 | -1.07581 | 0.002166 | 0.020168 | down |
| 113 | ENSG00000290404 | ENSG00000290404 | -1.20774 | 0.002901 | 0.025243 | down |
| 114 | ENSG00000198732 | SMOC1 | 1.08451 | 0.003713 | 0.030234 | up |
| 115 | ENSG00000255819 | KLRC4-KLRK1 | -1.16484 | 0.004029 | 0.032216 | down |
| 116 | ENSG00000196126 | HLA-DRB1 | -1.02042 | 0.004041 | 0.032262 | down |
| 117 | ENSG00000063438 | AHRR | -1.19704 | 0.004256 | 0.033499 | down |
| 118 | ENSG00000229454 | ENSG00000229454 | -1.21040 | 0.005694 | 0.041989 | down |
| 119 | ENSG00000230176 | LINC01433 | -1.07236 | 0.00676 | 0.04783 | down |

DEGs were defined as genes with |log₂ Fold Change| ≥ 1 and adjusted *p*-value < 0.05.

Table 3 Differentially expressed protein (control vs low dose)

| NO. | Protein.ID | Gene | Intensity in control group | Intensity in low-dose group | Fold Change | *p*-value | Regulated |
| --- | --- | --- | --- | --- | --- | --- | --- |
| 1 | A5YKK6 | CNOT1 | 0.002935 | 0.009238 | 3.147294 | 0.019842 | up |
| 2 | O00116 | AGPS | 0.009243 | 0.015033 | 1.626416 | 0.008373 | up |
| 3 | O00232 | PSMD12 | 0.014594 | 0.021912 | 1.501410 | 0.037419 | up |
| 4 | O00244 | ATOX1 | 0.048632 | 0.078887 | 1.622111 | 0.006160 | up |
| 5 | O00267 | SUPT5H | 0.017076 | 0.053112 | 3.110373 | 0.016804 | up |
| 6 | O00330 | PDHX | 0.000637 | 0.002253 | 3.535641 | 0.020902 | up |
| 7 | O00429 | DNM1L | 0.012948 | 0.019680 | 1.519894 | 0.007099 | up |
| 8 | O00487 | PSMD14 | 0.014754 | 0.007150 | 0.484618 | 0.028095 | down |
| 9 | O00629 | KPNA4 | 0.026306 | 0.041126 | 1.563361 | 0.023766 | up |
| 10 | O14530 | TXNDC9 | 0.005118 | 0.002333 | 0.455772 | 0.033798 | down |
| 11 | O14737 | PDCD5 | 0.032403 | 0.009200 | 0.283925 | 0.012127 | down |
| 12 | O14787 | TNPO2 | 0.000368 | 0.001562 | 4.250633 | 0.005315 | up |
| 13 | O14818 | PSMA7 | 0.065557 | 0.102047 | 1.556617 | 0.029285 | up |
| 14 | O15127 | SCAMP2 | 0.009132 | 0.023150 | 2.535137 | 0.047287 | up |
| 15 | O15144 | ARPC2 | 0.035712 | 0.063062 | 1.765862 | 0.000224 | up |
| 16 | O15145 | ARPC3 | 0.016760 | 0.008940 | 0.533428 | 0.022860 | down |
| 17 | O15226 | NKRF | 0.006312 | 0.016731 | 2.650527 | 0.036757 | up |
| 18 | O43242 | PSMD3 | 0.022320 | 0.035284 | 1.580831 | 0.004981 | up |
| 19 | O43324 | EEF1E1 | 0.027713 | 0.044340 | 1.599977 | 0.003398 | up |
| 20 | O43488 | AKR7A2 | 0.042085 | 0.088426 | 2.101149 | 0.035884 | up |
| 21 | O43837 | IDH3B | 0.000501 | 0.002121 | 4.233006 | 0.017415 | up |
| 22 | O60361 | NME2P1 | 0.007789 | 0.037733 | 4.844431 | 0.029406 | up |
| 23 | O60443 | GSDME | 0.007641 | 0.015240 | 1.994504 | 0.021730 | up |
| 24 | O60502 | OGA | 0.012153 | 0.020130 | 1.656460 | 0.008695 | up |
| 25 | O60610 | DIAPH1 | 0.010029 | 0.015831 | 1.578435 | 0.003657 | up |
| 26 | O60749 | SNX2 | 0.011134 | 0.019915 | 1.788580 | 0.005405 | up |
| 27 | O60763 | USO1 | 0.011072 | 0.017939 | 1.620163 | 0.009195 | up |
| 28 | O60826 | CCDC22 | 0.001060 | 0.002138 | 2.017187 | 0.013602 | up |
| 29 | O60831 | PRAF2 | 0.059996 | 0.095750 | 1.595922 | 0.004687 | up |
| 30 | O60832 | DKC1 | 0.008371 | 0.014258 | 1.703281 | 0.021486 | up |
| 31 | O75436 | VPS26A | 0.071986 | 0.112997 | 1.569712 | 0.020643 | up |
| 32 | O75477 | ERLIN1 | 0.022891 | 0.043936 | 1.919411 | 0.003293 | up |
| 33 | O75635 | SERPINB7 | 0.000861 | 0.025910 | 30.098024 | 0.005248 | up |
| 34 | O75844 | ZMPSTE24 | 0.009585 | 0.014933 | 1.557961 | 0.007009 | up |
| 35 | O76003 | GLRX3 | 0.030407 | 0.051319 | 1.687757 | 0.030262 | up |
| 36 | O76013 | KRT36 | 0.029383 | 0.005922 | 0.201536 | 0.031968 | down |
| 37 | O94804 | STK10 | 0.011391 | 0.045234 | 3.971133 | 0.042511 | up |
| 38 | O95232 | LUC7L3 | 0.015919 | 0.026220 | 1.647114 | 0.033199 | up |
| 39 | O95302 | FKBP9 | 0.004933 | 0.011156 | 2.261502 | 0.000220 | up |
| 40 | O95336 | PGLS | 0.016624 | 0.026725 | 1.607602 | 0.041059 | up |
| 41 | O95373 | IPO7 | 0.030719 | 0.054604 | 1.777543 | 0.000033 | up |
| 42 | O95456 | PSMG1 | 0.000881 | 0.002241 | 2.543977 | 0.048084 | up |
| 43 | O95573 | ACSL3 | 0.000807 | 0.005167 | 6.406285 | 0.003032 | up |
| 44 | O95671 | ASMTL | 0.001511 | 0.004012 | 2.654329 | 0.038651 | up |
| 45 | O95757 | HSPA4L | 0.002831 | 0.011093 | 3.918738 | 0.027543 | up |
| 46 | O95999 | BCL10 | 0.004747 | 0.013032 | 2.745615 | 0.039612 | up |
| 47 | P00491 | PNP | 0.022818 | 0.037772 | 1.655330 | 0.004903 | up |
| 48 | P00734 | F2 | 0.026342 | 0.040569 | 1.540092 | 0.017119 | up |
| 49 | P00742 | F10 | 0.003308 | 0.014023 | 4.238792 | 0.009484 | up |
| 50 | P01344 | IGF2 | 0.001325 | 0.002863 | 2.159979 | 0.042499 | up |
| 51 | P01893 | HLA-H | 0.004245 | 0.014141 | 3.330931 | 0.011931 | up |
| 52 | P02042;P68871 | HBB;HBD | 0.123777 | 0.014826 | 0.119783 | 0.004058 | down |
| 53 | P02748 | C9 | 0.046290 | 0.077274 | 1.669338 | 0.014420 | up |
| 54 | P04004 | VTN | 0.107199 | 0.264572 | 2.468052 | 0.003310 | up |
| 55 | P04040 | CAT | 0.025786 | 0.047252 | 1.832463 | 0.001787 | up |
| 56 | P04066 | FUCA1 | 0.008048 | 0.017185 | 2.135408 | 0.004770 | up |
| 57 | P04083 | ANXA1 | 0.137448 | 0.220864 | 1.606893 | 0.024561 | up |
| 58 | P04183 | TK1 | 0.007983 | 0.015169 | 1.900296 | 0.004108 | up |
| 59 | P04440 | HLA-DPB1 | 0.013585 | 0.024949 | 1.836495 | 0.002577 | up |
| 60 | P05091 | ALDH2 | 0.039558 | 0.061415 | 1.552516 | 0.000146 | up |
| 61 | P05362 | ICAM1 | 0.017217 | 0.030433 | 1.767665 | 0.030179 | up |
| 62 | P05455 | SSB | 0.218407 | 0.351270 | 1.608329 | 0.004822 | up |
| 63 | P06396 | GSN | 0.028698 | 0.043510 | 1.516159 | 0.016975 | up |
| 64 | P07099 | EPHX1 | 0.010742 | 0.021160 | 1.969771 | 0.000200 | up |
| 65 | P07108 | DBI | 0.039485 | 0.063418 | 1.606102 | 0.045809 | up |
| 66 | P07602 | PSAP | 0.044644 | 0.075711 | 1.695886 | 0.006097 | up |
| 67 | P07814 | EPRS1 | 0.018819 | 0.029552 | 1.570304 | 0.000764 | up |
| 68 | P07919 | UQCRH | 0.003793 | 0.011853 | 3.124531 | 0.018486 | up |
| 69 | P07996 | THBS1 | 0.045672 | 0.022145 | 0.484865 | 0.000960 | down |
| 70 | P08582 | MELTF | 0.012636 | 0.024439 | 1.934075 | 0.001203 | up |
| 71 | P08621 | SNRNP70 | 0.021788 | 0.036889 | 1.693119 | 0.005355 | up |
| 72 | P08754 | GNAI3 | 0.006086 | 0.010600 | 1.741834 | 0.010500 | up |
| 73 | P09104 | ENO2 | 0.017868 | 0.028434 | 1.591289 | 0.013320 | up |
| 74 | P09110 | ACAA1 | 0.000572 | 0.003411 | 5.962716 | 0.000766 | up |
| 75 | P09497 | CLTB | 0.013491 | 0.020586 | 1.525873 | 0.022211 | up |
| 76 | P09661 | SNRPA1 | 0.008620 | 0.018288 | 2.121643 | 0.045404 | up |
| 77 | P10155 | RO60 | 0.023911 | 0.037054 | 1.549660 | 0.022528 | up |
| 78 | P10301 | RRAS | 0.050332 | 0.026297 | 0.522467 | 0.006095 | down |
| 79 | P10321 | HLA-C | 0.072055 | 0.007589 | 0.105316 | 0.028239 | down |
| 80 | P11021 | HSPA5 | 0.400012 | 0.655270 | 1.638125 | 0.009928 | up |
| 81 | P11172 | UMPS | 0.013463 | 0.021642 | 1.607570 | 0.039977 | up |
| 82 | P11216 | PYGB | 0.050302 | 0.078002 | 1.550672 | 0.003305 | up |
| 83 | P11279 | LAMP1 | 0.074435 | 0.115827 | 1.556084 | 0.003585 | up |
| 84 | P11766 | ADH5 | 0.033972 | 0.065277 | 1.921467 | 0.011304 | up |
| 85 | P12259 | F5 | 0.030226 | 0.069581 | 2.302056 | 0.015630 | up |
| 86 | P12956 | XRCC6 | 0.042351 | 0.067284 | 1.588738 | 0.000386 | up |
| 87 | P13667 | PDIA4 | 0.071886 | 0.118775 | 1.652266 | 0.004712 | up |
| 88 | P13797 | PLS3 | 0.054531 | 0.083345 | 1.528385 | 0.007573 | up |
| 89 | P13987 | CD59 | 0.039453 | 0.064973 | 1.646864 | 0.012154 | up |
| 90 | P14314 | PRKCSH | 0.112063 | 0.168171 | 1.500679 | 0.010630 | up |
| 91 | P15121 | AKR1B1 | 0.051681 | 0.083893 | 1.623272 | 0.001389 | up |
| 92 | P17980 | PSMC3 | 0.027202 | 0.044437 | 1.633595 | 0.017555 | up |
| 93 | P18206 | VCL | 0.113100 | 0.180332 | 1.594448 | 0.007607 | up |
| 94 | P18858 | LIG1 | 0.000362 | 0.000770 | 2.125955 | 0.049734 | up |
| 95 | P19525 | EIF2AK2 | 0.003397 | 0.001837 | 0.540878 | 0.010053 | down |
| 96 | P20073 | ANXA7 | 0.018042 | 0.027159 | 1.505306 | 0.001692 | up |
| 97 | P20290 | BTF3 | 0.016660 | 0.008426 | 0.505770 | 0.001873 | down |
| 98 | P20674 | COX5A | 0.043360 | 0.020317 | 0.468572 | 0.019916 | down |
| 99 | P20908 | COL5A1 | 0.001900 | 0.004910 | 2.583831 | 0.040104 | up |
| 100 | P21283 | ATP6V1C1 | 0.002822 | 0.010085 | 3.574148 | 0.019997 | up |
| 101 | P21926 | CD9 | 0.008732 | 0.034789 | 3.984008 | 0.007717 | up |
| 102 | P22352 | GPX3 | 0.004592 | 0.013479 | 2.935412 | 0.035595 | up |
| 103 | P22676 | CALB2 | 0.008792 | 0.016941 | 1.926848 | 0.003560 | up |
| 104 | P22695 | UQCRC2 | 0.015116 | 0.026004 | 1.720283 | 0.035809 | up |
| 105 | P23246 | SFPQ | 0.051416 | 0.077487 | 1.507064 | 0.019021 | up |
| 106 | P23284 | PPIB | 0.130633 | 0.263492 | 2.017045 | 0.000063 | up |
| 107 | P23634 | ATP2B4 | 0.005576 | 0.015611 | 2.799648 | 0.034006 | up |
| 108 | P25788 | PSMA3 | 0.049549 | 0.093403 | 1.885053 | 0.003938 | up |
| 109 | P26196 | DDX6 | 0.021066 | 0.034717 | 1.648016 | 0.012639 | up |
| 110 | P26440 | IVD | 0.004751 | 0.007821 | 1.646040 | 0.013738 | up |
| 111 | P26583 | HMGB2 | 0.028812 | 0.046709 | 1.621124 | 0.034592 | up |
| 112 | P27694 | RPA1 | 0.022042 | 0.035024 | 1.588993 | 0.033426 | up |
| 113 | P27701 | CD82 | 0.008948 | 0.024134 | 2.697123 | 0.002272 | up |
| 114 | P27824 | CANX | 0.099857 | 0.186733 | 1.870011 | 0.009450 | up |
| 115 | P28062 | PSMB8 | 0.008605 | 0.016512 | 1.918815 | 0.014056 | up |
| 116 | P28300 | LOX | 0.001941 | 0.003602 | 1.855717 | 0.022202 | up |
| 117 | P28799 | GRN | 0.003351 | 0.012069 | 3.601992 | 0.006951 | up |
| 118 | P29034 | S100A2 | 0.003003 | 0.044837 | 14.929174 | 0.000390 | up |
| 119 | P29317 | EPHA2 | 0.024986 | 0.039928 | 1.598022 | 0.000523 | up |
| 120 | P30048 | PRDX3 | 0.046121 | 0.071187 | 1.543486 | 0.030021 | up |
| 121 | P30153 | PPP2R1A | 0.073456 | 0.119031 | 1.620454 | 0.002357 | up |
| 122 | P30405 | PPIF | 0.010680 | 0.032686 | 3.060453 | 0.032521 | up |
| 123 | P30419 | NMT1 | 0.014624 | 0.025811 | 1.764958 | 0.013881 | up |
| 124 | P31942 | HNRNPH3 | 0.031512 | 0.048571 | 1.541345 | 0.014213 | up |
| 125 | P31946 | YWHAB | 0.075101 | 0.132592 | 1.765511 | 0.010043 | up |
| 126 | P32456 | GBP2 | 0.005745 | 0.020455 | 3.560711 | 0.028506 | up |
| 127 | P33527 | ABCC1 | 0.000265 | 0.000800 | 3.016495 | 0.012846 | up |
| 128 | P33991 | MCM4 | 0.024655 | 0.043650 | 1.770445 | 0.000382 | up |
| 129 | P34931 | HSPA1L | 0.085041 | 0.182789 | 2.149423 | 0.005964 | up |
| 130 | P35268 | RPL22 | 0.080240 | 0.019798 | 0.246739 | 0.022161 | down |
| 131 | P35998 | PSMC2 | 0.053749 | 0.087889 | 1.635173 | 0.016233 | up |
| 132 | P36969 | GPX4 | 0.005499 | 0.010325 | 1.877554 | 0.048648 | up |
| 133 | P38117 | ETFB | 0.015105 | 0.024618 | 1.629820 | 0.004375 | up |
| 134 | P38646 | HSPA9 | 0.070990 | 0.108048 | 1.522022 | 0.016678 | up |
| 135 | P38919 | EIF4A3 | 0.017298 | 0.030737 | 1.776925 | 0.003102 | up |
| 136 | P39687 | ANP32A | 0.036661 | 0.074920 | 2.043627 | 0.002596 | up |
| 137 | P40123 | CAP2 | 0.008898 | 0.016584 | 1.863798 | 0.005338 | up |
| 138 | P40925 | MDH1 | 0.064336 | 0.115561 | 1.796228 | 0.009159 | up |
| 139 | P40939 | HADHA | 0.043629 | 0.067124 | 1.538516 | 0.010462 | up |
| 140 | P42224 | STAT1 | 0.010270 | 0.018783 | 1.828958 | 0.001500 | up |
| 141 | P42330 | AKR1C3 | 0.009559 | 0.018457 | 1.930864 | 0.028956 | up |
| 142 | P46734 | MAP2K3 | 0.003899 | 0.012882 | 3.303972 | 0.026813 | up |
| 143 | P46777 | RPL5 | 0.075811 | 0.044725 | 0.589944 | 0.022065 | down |
| 144 | P47897 | QARS1 | 0.026186 | 0.040106 | 1.531590 | 0.002810 | up |
| 145 | P48147 | PREP | 0.001742 | 0.004154 | 2.384702 | 0.043527 | up |
| 146 | P48426 | PIP4K2A | 0.004814 | 0.008779 | 1.823766 | 0.003205 | up |
| 147 | P48556 | PSMD8 | 0.013567 | 0.021303 | 1.570201 | 0.036422 | up |
| 148 | P49189 | ALDH9A1 | 0.020172 | 0.037017 | 1.835064 | 0.019009 | up |
| 149 | P49257 | LMAN1 | 0.047192 | 0.079705 | 1.688953 | 0.014701 | up |
| 150 | P49589 | CARS1 | 0.019442 | 0.037038 | 1.905024 | 0.003619 | up |
| 151 | P49720 | PSMB3 | 0.021980 | 0.034598 | 1.574092 | 0.032778 | up |
| 152 | P49721 | PSMB2 | 0.011029 | 0.005047 | 0.457558 | 0.037228 | down |
| 153 | P49756 | RBM25 | 0.017860 | 0.034790 | 1.947997 | 0.034342 | up |
| 154 | P49903 | SEPHS1 | 0.001960 | 0.004448 | 2.268872 | 0.018180 | up |
| 155 | P50395 | GDI2 | 0.148951 | 0.223467 | 1.500276 | 0.001178 | up |
| 156 | P50914 | RPL14 | 0.035653 | 0.011830 | 0.331802 | 0.025722 | down |
| 157 | P50990 | CCT8 | 0.082734 | 0.126279 | 1.526328 | 0.029755 | up |
| 158 | P50991 | CCT4 | 0.049212 | 0.073828 | 1.500198 | 0.037471 | up |
| 159 | P50995 | ANXA11 | 0.027300 | 0.043820 | 1.605092 | 0.000316 | up |
| 160 | P51148 | RAB5C | 0.027343 | 0.044591 | 1.630797 | 0.010435 | up |
| 161 | P51572 | BCAP31 | 0.095259 | 0.156615 | 1.644100 | 0.021231 | up |
| 162 | P51659 | HSD17B4 | 0.041588 | 0.062407 | 1.500605 | 0.006029 | up |
| 163 | P52209 | PGD | 0.038898 | 0.070925 | 1.823374 | 0.000015 | up |
| 164 | P52815 | MRPL12 | 0.008558 | 0.026922 | 3.145958 | 0.016192 | up |
| 165 | P53396 | ACLY | 0.049639 | 0.084532 | 1.702929 | 0.000038 | up |
| 166 | P54687 | BCAT1 | 0.003180 | 0.010208 | 3.209738 | 0.015472 | up |
| 167 | P55084 | HADHB | 0.021852 | 0.036462 | 1.668565 | 0.011148 | up |
| 168 | P55145 | MANF | 0.072285 | 0.139722 | 1.932931 | 0.007378 | up |
| 169 | P55854;P61956;Q6EEV6 | SUMO2;SUMO3;SUMO4 | 0.066354 | 0.013528 | 0.203873 | 0.006110 | down |
| 170 | P55957 | BID | 0.002093 | 0.003995 | 1.909065 | 0.017948 | up |
| 171 | P56192 | MARS1 | 0.024229 | 0.039138 | 1.615362 | 0.020586 | up |
| 172 | P56377 | AP1S2 | 0.005369 | 0.015779 | 2.938766 | 0.044653 | up |
| 173 | P56385 | ATP5ME | 0.007793 | 0.024430 | 3.135008 | 0.006552 | up |
| 174 | P57740 | NUP107 | 0.000310 | 0.000754 | 2.430962 | 0.026683 | up |
| 175 | P60903 | S100A10 | 0.062593 | 0.141575 | 2.261832 | 0.018322 | up |
| 176 | P60981 | DSTN | 0.025782 | 0.045977 | 1.783289 | 0.003354 | up |
| 177 | P61009 | SPCS3 | 0.009821 | 0.026671 | 2.715664 | 0.036746 | up |
| 178 | P61011 | SRP54 | 0.006700 | 0.017608 | 2.628154 | 0.035235 | up |
| 179 | P61026 | RAB10 | 0.107759 | 0.049258 | 0.457109 | 0.030734 | down |
| 180 | P61225 | RAP2B | 0.002057 | 0.005414 | 2.631976 | 0.035043 | up |
| 181 | P61289 | PSME3 | 0.011657 | 0.024779 | 2.125659 | 0.001717 | up |
| 182 | P61353 | RPL27 | 0.059112 | 0.032995 | 0.558174 | 0.036541 | down |
| 183 | P61457 | PCBD1 | 0.010893 | 0.028017 | 2.572017 | 0.001707 | up |
| 184 | P61619 | SEC61A1 | 0.081144 | 0.146788 | 1.808982 | 0.036948 | up |
| 185 | P61970 | NUTF2 | 0.006977 | 0.012674 | 1.816614 | 0.005871 | up |
| 186 | P62195 | PSMC5 | 0.015865 | 0.027834 | 1.754420 | 0.029379 | up |
| 187 | P62760;Q9UM19 | HPCAL4;VSNL1 | 0.004201 | 0.047516 | 11.310403 | 0.002500 | up |
| 188 | P62942 | FKBP1A | 0.103374 | 0.163054 | 1.577325 | 0.033579 | up |
| 189 | P63010 | AP2B1 | 0.023584 | 0.037206 | 1.577627 | 0.001908 | up |
| 190 | P63104 | YWHAZ | 0.174976 | 0.287713 | 1.644296 | 0.047418 | up |
| 191 | P68400 | CSNK2A1 | 0.010301 | 0.016907 | 1.641312 | 0.015156 | up |
| 192 | P80303 | NUCB2 | 0.005945 | 0.010474 | 1.761917 | 0.011986 | up |
| 193 | P98175 | RBM10 | 0.003620 | 0.007464 | 2.061863 | 0.006896 | up |
| 194 | Q00535 | CDK5 | 0.000823 | 0.001747 | 2.121402 | 0.022807 | up |
| 195 | Q00653 | NFKB2 | 0.010832 | 0.027876 | 2.573494 | 0.043165 | up |
| 196 | Q00688 | FKBP3 | 0.018078 | 0.029561 | 1.635192 | 0.002341 | up |
| 197 | Q01130 | SRSF2 | 0.127565 | 0.031996 | 0.250822 | 0.042073 | down |
| 198 | Q01813 | PFKP | 0.171423 | 0.285203 | 1.663738 | 0.000089 | up |
| 199 | Q02218 | OGDH | 0.049959 | 0.082288 | 1.647116 | 0.016775 | up |
| 200 | Q02809 | PLOD1 | 0.023779 | 0.037507 | 1.577290 | 0.020264 | up |
| 201 | Q02818 | NUCB1 | 0.010030 | 0.018545 | 1.848986 | 0.020967 | up |
| 202 | Q03135 | CAV1 | 0.041264 | 0.087808 | 2.127924 | 0.011300 | up |
| 203 | Q05193 | DNM1 | 0.001542 | 0.004114 | 2.667453 | 0.049837 | up |
| 204 | Q06124 | PTPN11 | 0.011338 | 0.019417 | 1.712614 | 0.012395 | up |
| 205 | Q07866 | KLC1 | 0.013270 | 0.020329 | 1.532019 | 0.004061 | up |
| 206 | Q07960 | ARHGAP1 | 0.009813 | 0.015035 | 1.532213 | 0.004840 | up |
| 207 | Q08379 | GOLGA2 | 0.001526 | 0.002834 | 1.857092 | 0.045963 | up |
| 208 | Q08380 | LGALS3BP | 0.011822 | 0.018516 | 1.566209 | 0.014081 | up |
| 209 | Q08623 | PUDP | 0.009973 | 0.016337 | 1.638040 | 0.016614 | up |
| 210 | Q08722 | CD47 | 0.023457 | 0.049127 | 2.094374 | 0.000105 | up |
| 211 | Q09161 | NCBP1 | 0.000835 | 0.002407 | 2.880598 | 0.022613 | up |
| 212 | Q0VDF9 | HSPA14 | 0.014138 | 0.030369 | 2.147937 | 0.012721 | up |
| 213 | Q10471 | GALNT2 | 0.013449 | 0.023755 | 1.766331 | 0.008506 | up |
| 214 | Q10589 | BST2 | 0.015705 | 0.029234 | 1.861372 | 0.024963 | up |
| 215 | Q12907 | LMAN2 | 0.058372 | 0.095742 | 1.640204 | 0.016784 | up |
| 216 | Q12913 | PTPRJ | 0.000797 | 0.003317 | 4.159099 | 0.033745 | up |
| 217 | Q13098 | GPS1 | 0.001325 | 0.004194 | 3.166328 | 0.010917 | up |
| 218 | Q13177 | PAK2 | 0.022921 | 0.037093 | 1.618251 | 0.001487 | up |
| 219 | Q13418 | ILK | 0.005762 | 0.012274 | 2.130057 | 0.005221 | up |
| 220 | Q13510 | ASAH1 | 0.001655 | 0.004915 | 2.969191 | 0.019101 | up |
| 221 | Q13595 | TRA2A | 0.002434 | 0.008282 | 3.402760 | 0.045669 | up |
| 222 | Q13617 | CUL2 | 0.007033 | 0.011834 | 1.682592 | 0.002021 | up |
| 223 | Q13620 | CUL4B | 0.014663 | 0.026320 | 1.795063 | 0.000900 | up |
| 224 | Q13637 | RAB32 | 0.002008 | 0.003735 | 1.859859 | 0.007456 | up |
| 225 | Q13641 | TPBG | 0.005684 | 0.015219 | 2.677308 | 0.014827 | up |
| 226 | Q13724 | MOGS | 0.018336 | 0.029576 | 1.612993 | 0.002187 | up |
| 227 | Q13740 | ALCAM | 0.057381 | 0.095148 | 1.658194 | 0.002061 | up |
| 228 | Q13867 | BLMH | 0.016351 | 0.026916 | 1.646154 | 0.027273 | up |
| 229 | Q13868 | EXOSC2 | 0.004579 | 0.011337 | 2.475843 | 0.046921 | up |
| 230 | Q13952 | NFYC | 0.000130 | 0.000260 | 1.993674 | 0.044396 | up |
| 231 | Q14108 | SCARB2 | 0.012587 | 0.025376 | 2.016027 | 0.027833 | up |
| 232 | Q14118 | DAG1 | 0.003683 | 0.008662 | 2.351819 | 0.015422 | up |
| 233 | Q14165 | MLEC | 0.008407 | 0.014134 | 1.681294 | 0.011075 | up |
| 234 | Q14240 | EIF4A2 | 0.005204 | 0.008946 | 1.718997 | 0.041743 | up |
| 235 | Q14247 | CTTN | 0.023910 | 0.037198 | 1.555717 | 0.040542 | up |
| 236 | Q14258 | TRIM25 | 0.015178 | 0.024435 | 1.609888 | 0.005851 | up |
| 237 | Q14558 | PRPSAP1 | 0.007625 | 0.022846 | 2.996228 | 0.023773 | up |
| 238 | Q14696 | MESD | 0.010652 | 0.016547 | 1.553349 | 0.001704 | up |
| 239 | Q14764 | MVP | 0.034820 | 0.055952 | 1.606898 | 0.001491 | up |
| 240 | Q15003 | NCAPH | 0.007657 | 0.004348 | 0.567931 | 0.019880 | down |
| 241 | Q15006 | EMC2 | 0.002022 | 0.006063 | 2.999199 | 0.020545 | up |
| 242 | Q15041 | ARL6IP1 | 0.021891 | 0.037281 | 1.702996 | 0.048019 | up |
| 243 | Q15061 | WDR43 | 0.000653 | 0.001012 | 1.549877 | 0.000880 | up |
| 244 | Q15084 | PDIA6 | 0.073558 | 0.115501 | 1.570198 | 0.033578 | up |
| 245 | Q15382 | RHEB | 0.057640 | 0.110603 | 1.918877 | 0.004186 | up |
| 246 | Q15404 | RSU1 | 0.005417 | 0.030935 | 5.710790 | 0.010743 | up |
| 247 | Q15424 | SAFB | 0.026591 | 0.041734 | 1.569456 | 0.002054 | up |
| 248 | Q15436 | SEC23A | 0.008206 | 0.022194 | 2.704480 | 0.032994 | up |
| 249 | Q15758 | SLC1A5 | 0.021672 | 0.049699 | 2.293170 | 0.003568 | up |
| 250 | Q15785 | TOMM34 | 0.001586 | 0.005402 | 3.405282 | 0.010127 | up |
| 251 | Q16181 | SEPTIN7 | 0.011589 | 0.022802 | 1.967632 | 0.009584 | up |
| 252 | Q16401 | PSMD5 | 0.027735 | 0.044412 | 1.601311 | 0.000399 | up |
| 253 | Q16512 | PKN1 | 0.005639 | 0.010311 | 1.828284 | 0.005915 | up |
| 254 | Q16555 | DPYSL2 | 0.013762 | 0.024309 | 1.766346 | 0.005909 | up |
| 255 | Q16777;Q6FI13 | H2AC18;H2AC20 | 0.174199 | 0.047647 | 0.273520 | 0.043586 | down |
| 256 | Q16851 | UGP2 | 0.038558 | 0.060849 | 1.578089 | 0.017141 | up |
| 257 | Q53S08 | RAB6D | 0.006932 | 0.130969 | 18.892375 | 0.013176 | up |
| 258 | Q58FF8 | HSP90AB2P | 0.155481 | 0.042212 | 0.271495 | 0.022831 | down |
| 259 | Q5R3I4 | TTC38 | 0.000819 | 0.000245 | 0.298583 | 0.049869 | down |
| 260 | Q63HN8 | RNF213 | 0.000860 | 0.001971 | 2.290868 | 0.003747 | up |
| 261 | Q6KB66 | KRT80 | 0.009789 | 0.051545 | 5.265860 | 0.038584 | up |
| 262 | Q6NUK1 | SLC25A24 | 0.022947 | 0.037092 | 1.616381 | 0.026783 | up |
| 263 | Q6NYC8 | PPP1R18 | 0.001033 | 0.002832 | 2.740674 | 0.021101 | up |
| 264 | Q6YN16 | HSDL2 | 0.027009 | 0.044810 | 1.659069 | 0.008958 | up |
| 265 | Q70UQ0 | IKBIP | 0.036515 | 0.067104 | 1.837717 | 0.001276 | up |
| 266 | Q7L1Q6 | BZW1 | 0.091578 | 0.138201 | 1.509102 | 0.023917 | up |
| 267 | Q7L5N1 | COPS6 | 0.001220 | 0.003204 | 2.626365 | 0.048413 | up |
| 268 | Q7Z4Q2 | HEATR3 | 0.000235 | 0.000490 | 2.080774 | 0.035261 | up |
| 269 | Q8IWA5 | SLC44A2 | 0.001763 | 0.003566 | 2.022311 | 0.022755 | up |
| 270 | Q8IXI1 | RHOT2 | 0.003206 | 0.007606 | 2.372680 | 0.034943 | up |
| 271 | Q8IY17 | PNPLA6 | 0.000772 | 0.003376 | 4.374582 | 0.008591 | up |
| 272 | Q8IYD1 | GSPT2 | 0.006529 | 0.002662 | 0.407821 | 0.010306 | down |
| 273 | Q8IZ07;Q6ZTN6 | ANKRD13A;ANKRD13D | 0.000217 | 0.000533 | 2.458618 | 0.010755 | up |
| 274 | Q8IZ73 | RPUSD2 | 0.001887 | 0.011217 | 5.945139 | 0.012893 | up |
| 275 | Q8N1F7 | NUP93 | 0.018573 | 0.031399 | 1.690585 | 0.005750 | up |
| 276 | Q8NBU5 | ATAD1 | 0.002892 | 0.009618 | 3.325857 | 0.012301 | up |
| 277 | Q8WUK0 | PTPMT1 | 0.000165 | 0.000658 | 3.982233 | 0.004393 | up |
| 278 | Q8WVY7 | UBLCP1 | 0.015425 | 0.024940 | 1.616830 | 0.024212 | up |
| 279 | Q8WWM7 | ATXN2L | 0.012164 | 0.020287 | 1.667798 | 0.025391 | up |
| 280 | Q8WX92 | NELFB | 0.001214 | 0.003491 | 2.875587 | 0.037534 | up |
| 281 | Q92616 | GCN1 | 0.036601 | 0.056240 | 1.536559 | 0.003206 | up |
| 282 | Q92692 | NECTIN2 | 0.041272 | 0.066873 | 1.620310 | 0.046228 | up |
| 283 | Q92878 | RAD50 | 0.025419 | 0.039578 | 1.556995 | 0.000700 | up |
| 284 | Q92890 | UFD1 | 0.004565 | 0.009048 | 1.981759 | 0.007634 | up |
| 285 | Q969S9 | GFM2 | 0.028915 | 0.086771 | 3.000887 | 0.000031 | up |
| 286 | Q96A49 | SYAP1 | 0.005700 | 0.019846 | 3.481554 | 0.008415 | up |
| 287 | Q96B97 | SH3KBP1 | 0.011001 | 0.018577 | 1.688615 | 0.012532 | up |
| 288 | Q96HS1 | PGAM5 | 0.014165 | 0.021773 | 1.537096 | 0.035233 | up |
| 289 | Q96IY4 | CPB2 | 0.001578 | 0.008834 | 5.599681 | 0.001995 | up |
| 290 | Q96JJ3 | ELMO2 | 0.000930 | 0.004189 | 4.505073 | 0.005072 | up |
| 291 | Q96P70 | IPO9 | 0.001553 | 0.002692 | 1.733638 | 0.006246 | up |
| 292 | Q96TA1 | NIBAN2 | 0.042618 | 0.066478 | 1.559853 | 0.006091 | up |
| 293 | Q99426 | TBCB | 0.031128 | 0.048862 | 1.569721 | 0.009040 | up |
| 294 | Q99436 | PSMB7 | 0.030882 | 0.059827 | 1.937308 | 0.000449 | up |
| 295 | Q99460 | PSMD1 | 0.027882 | 0.044023 | 1.578922 | 0.004691 | up |
| 296 | Q99584 | S100A13 | 0.020813 | 0.035934 | 1.726502 | 0.037309 | up |
| 297 | Q99653 | CHP1 | 0.008573 | 0.013936 | 1.625507 | 0.003152 | up |
| 298 | Q9BQ04;Q9BWF3 | RBM4;RBM4B | 0.016879 | 0.041874 | 2.480796 | 0.000980 | up |
| 299 | Q9BQA1 | WDR77 | 0.015078 | 0.024793 | 1.644342 | 0.000034 | up |
| 300 | Q9BR76 | CORO1B | 0.012243 | 0.026681 | 2.179224 | 0.000225 | up |
| 301 | Q9BRF8 | CPPED1 | 0.001396 | 0.004021 | 2.880602 | 0.026724 | up |
| 302 | Q9BTD8 | RBM42 | 0.001647 | 0.003008 | 1.825789 | 0.008452 | up |
| 303 | Q9BTU6 | PI4K2A | 0.000509 | 0.001476 | 2.901944 | 0.011386 | up |
| 304 | Q9BTW9 | TBCD | 0.018987 | 0.032139 | 1.692730 | 0.008045 | up |
| 305 | Q9BVC6 | TMEM109 | 0.040883 | 0.076242 | 1.864894 | 0.016606 | up |
| 306 | Q9BXS5 | AP1M1 | 0.011927 | 0.031467 | 2.638310 | 0.037869 | up |
| 307 | Q9BYJ9 | YTHDF1 | 0.028491 | 0.057035 | 2.001839 | 0.004685 | up |
| 308 | Q9BYN0 | SRXN1 | 0.003074 | 0.009452 | 3.075331 | 0.029603 | up |
| 309 | Q9BYZ2 | LDHAL6B | 0.061461 | 0.024579 | 0.399913 | 0.032726 | down |
| 310 | Q9BZQ8 | NIBAN1 | 0.001270 | 0.004680 | 3.684802 | 0.021579 | up |
| 311 | Q9BZZ5 | API5 | 0.048443 | 0.087605 | 1.808395 | 0.001106 | up |
| 312 | Q9H0B6 | KLC2 | 0.000602 | 0.006105 | 10.137070 | 0.007326 | up |
| 313 | Q9H0U3 | MAGT1 | 0.011833 | 0.049891 | 4.216344 | 0.014725 | up |
| 314 | Q9H2M9 | RAB3GAP2 | 0.010430 | 0.021108 | 2.023817 | 0.006189 | up |
| 315 | Q9H444 | CHMP4B | 0.016591 | 0.026721 | 1.610577 | 0.028260 | up |
| 316 | Q9H4A4 | RNPEP | 0.038879 | 0.058908 | 1.515152 | 0.011028 | up |
| 317 | Q9H4M9 | EHD1 | 0.062637 | 0.117121 | 1.869824 | 0.002147 | up |
| 318 | Q9H773 | DCTPP1 | 0.000813 | 0.003382 | 4.160936 | 0.006532 | up |
| 319 | Q9H853 | TUBA4B | 0.212555 | 0.007926 | 0.037290 | 0.005361 | down |
| 320 | Q9H9J2 | MRPL44 | 0.007480 | 0.012521 | 1.674057 | 0.000580 | up |
| 321 | Q9HAB8 | PPCS | 0.003017 | 0.005030 | 1.667145 | 0.014554 | up |
| 322 | Q9HAV4 | XPO5 | 0.002000 | 0.003171 | 1.585327 | 0.014083 | up |
| 323 | Q9HC38 | GLOD4 | 0.011669 | 0.020720 | 1.775663 | 0.042603 | up |
| 324 | Q9HDC9 | APMAP | 0.039640 | 0.061840 | 1.560044 | 0.009538 | up |
| 325 | Q9NP97 | DYNLRB1 | 0.029451 | 0.051598 | 1.751993 | 0.028104 | up |
| 326 | Q9NPD3 | EXOSC4 | 0.006518 | 0.010072 | 1.545207 | 0.032109 | up |
| 327 | Q9NR45 | NANS | 0.019404 | 0.030869 | 1.590853 | 0.000834 | up |
| 328 | Q9NRP0 | OSTC | 0.004785 | 0.009279 | 1.939147 | 0.031289 | up |
| 329 | Q9NRW7 | VPS45 | 0.000714 | 0.001728 | 2.420707 | 0.037343 | up |
| 330 | Q9NSD9 | FARSB | 0.006827 | 0.013707 | 2.007647 | 0.006491 | up |
| 331 | Q9NTK5 | OLA1 | 0.028928 | 0.045912 | 1.587112 | 0.009545 | up |
| 332 | Q9NVA2 | SEPTIN11 | 0.024094 | 0.045964 | 1.907704 | 0.015289 | up |
| 333 | Q9NX40 | OCIAD1 | 0.040295 | 0.072696 | 1.804124 | 0.041459 | up |
| 334 | Q9NY12 | GAR1 | 0.004557 | 0.007779 | 1.707122 | 0.040637 | up |
| 335 | Q9NZL4 | HSPBP1 | 0.003077 | 0.005507 | 1.790037 | 0.017871 | up |
| 336 | Q9NZM1 | MYOF | 0.050500 | 0.083065 | 1.644852 | 0.003869 | up |
| 337 | Q9P2X0 | DPM3 | 0.006155 | 0.018183 | 2.954295 | 0.042947 | up |
| 338 | Q9UBI6 | GNG12 | 0.011838 | 0.018274 | 1.543749 | 0.034714 | up |
| 339 | Q9UBV2 | SEL1L | 0.001103 | 0.003890 | 3.526347 | 0.008337 | up |
| 340 | Q9UGI8 | TES | 0.020119 | 0.031234 | 1.552464 | 0.004087 | up |
| 341 | Q9UHV9 | PFDN2 | 0.014020 | 0.026302 | 1.875941 | 0.021974 | up |
| 342 | Q9UI30 | TRMT112 | 0.002503 | 0.006267 | 2.503130 | 0.038174 | up |
| 343 | Q9UIJ7 | AK3 | 0.005338 | 0.014802 | 2.772777 | 0.030232 | up |
| 344 | Q9UJX5 | ANAPC4 | 0.000173 | 0.000480 | 2.767309 | 0.004674 | up |
| 345 | Q9UKN8 | GTF3C4 | 0.000728 | 0.001805 | 2.480475 | 0.036283 | up |
| 346 | Q9UL25 | RAB21 | 0.002807 | 0.008140 | 2.900264 | 0.045789 | up |
| 347 | Q9ULZ3 | PYCARD | 0.007950 | 0.017208 | 2.164543 | 0.004477 | up |
| 348 | Q9UM54 | MYO6 | 0.005012 | 0.026352 | 5.257411 | 0.014802 | up |
| 349 | Q9UNI6 | DUSP12 | 0.002579 | 0.004652 | 1.803687 | 0.009885 | up |
| 350 | Q9UNZ2 | NSFL1C | 0.046405 | 0.072162 | 1.555041 | 0.002363 | up |
| 351 | Q9UPN3 | MACF1 | 0.002764 | 0.004755 | 1.720165 | 0.048870 | up |
| 352 | Q9Y265 | RUVBL1 | 0.024508 | 0.041887 | 1.709121 | 0.006693 | up |
| 353 | Q9Y2B0 | CNPY2 | 0.038906 | 0.085985 | 2.210077 | 0.033939 | up |
| 354 | Q9Y2D5 | PALM2AKAP2 | 0.014961 | 0.024417 | 1.631993 | 0.010434 | up |
| 355 | Q9Y2Q3 | GSTK1 | 0.021659 | 0.039851 | 1.839911 | 0.028961 | up |
| 356 | Q9Y2T2 | AP3M1 | 0.006494 | 0.019518 | 3.005630 | 0.026225 | up |
| 357 | Q9Y316 | MEMO1 | 0.000463 | 0.001334 | 2.880768 | 0.043266 | up |
| 358 | Q9Y320 | TMX2 | 0.006783 | 0.012519 | 1.845615 | 0.004123 | up |
| 359 | Q9Y3C6 | PPIL1 | 0.010606 | 0.017875 | 1.685347 | 0.001173 | up |
| 360 | Q9Y3E0 | GOLT1B | 0.003599 | 0.007928 | 2.202869 | 0.026238 | up |
| 361 | Q9Y3E7 | CHMP3 | 0.006173 | 0.016502 | 2.672994 | 0.032833 | up |
| 362 | Q9Y3T9 | NOC2L | 0.005518 | 0.016012 | 2.901514 | 0.040805 | up |
| 363 | Q9Y3Z3 | SAMHD1 | 0.012042 | 0.030848 | 2.561697 | 0.005329 | up |
| 364 | Q9Y4E8 | USP15 | 0.000137 | 0.000261 | 1.902581 | 0.021447 | up |
| 365 | Q9Y4L1 | HYOU1 | 0.040942 | 0.071750 | 1.752481 | 0.014381 | up |
| 366 | Q9Y512 | SAMM50 | 0.002533 | 0.006031 | 2.381097 | 0.049091 | up |
| 367 | Q9Y5M8 | SRPRB | 0.006698 | 0.018859 | 2.815687 | 0.044751 | up |
| 368 | Q9Y5Z4 | HEBP2 | 0.003994 | 0.008467 | 2.119909 | 0.019114 | up |
| 369 | Q9Y617 | PSAT1 | 0.058667 | 0.115585 | 1.970180 | 0.004557 | up |
| 370 | Q9Y6D5;Q9Y6D6 | ARFGEF1;ARFGEF2 | 0.000507 | 0.001118 | 2.204977 | 0.001452 | up |
| 371 | Q9Y6N5 | SQOR | 0.017707 | 0.028375 | 1.602500 | 0.002890 | up |
| 372 | Q9Y6V7 | DDX49 | 0.006933 | 0.030573 | 4.409529 | 0.033519 | up |

DEPs were defined as proteins with *p* < 0.05, FC > 1.5 or < 0.67.

**Table S4** Differentially expressed protein (control vs high dose)

| NO. | Protein.ID | Gene | Intensity in control group | Intensity in high-does group | Fold Change | *p*-value | Regulated |
| --- | --- | --- | --- | --- | --- | --- | --- |
| 1 | B5ME19;Q99613 | EIF3C;EIF3CL | 0.035652 | 0.023139 | 0.649026 | 0.029414 | down |
| 2 | O00391 | QSOX1 | 0.009022 | 0.026261 | 2.910773 | 0.038477 | up |
| 3 | O00487 | PSMD14 | 0.014754 | 0.005136 | 0.348131 | 0.040493 | down |
| 4 | O14530 | TXNDC9 | 0.005118 | 0.000961 | 0.187684 | 0.017429 | down |
| 5 | O14737 | PDCD5 | 0.032403 | 0.015352 | 0.473799 | 0.003758 | down |
| 6 | O14787 | TNPO2 | 0.000368 | 0.001113 | 3.027564 | 0.047951 | up |
| 7 | O15145 | ARPC3 | 0.016760 | 0.006118 | 0.365018 | 0.039739 | down |
| 8 | O43172 | PRPF4 | 0.012656 | 0.001274 | 0.100685 | 0.004481 | down |
| 9 | O43837 | IDH3B | 0.000501 | 0.001449 | 2.891106 | 0.019166 | up |
| 10 | O60443 | GSDME | 0.007641 | 0.011587 | 1.516409 | 0.021829 | up |
| 11 | O75153 | CLUH | 0.023922 | 0.006113 | 0.255537 | 0.024083 | down |
| 12 | O75351 | VPS4B | 0.006723 | 0.003654 | 0.543536 | 0.000591 | down |
| 13 | O75534 | CSDE1 | 0.060092 | 0.038345 | 0.638099 | 0.027762 | down |
| 14 | O95302 | FKBP9 | 0.004933 | 0.008266 | 1.675634 | 0.016415 | up |
| 15 | O95573 | ACSL3 | 0.000807 | 0.003184 | 3.947741 | 0.004756 | up |
| 16 | P00450 | CP | 0.003563 | 0.018820 | 5.282221 | 0.001745 | up |
| 17 | P00734 | F2 | 0.026342 | 0.056697 | 2.152355 | 0.012528 | up |
| 18 | P00742 | F10 | 0.003308 | 0.022756 | 6.878317 | 0.003056 | up |
| 19 | P00749 | PLAU | 0.008759 | 0.014622 | 1.669365 | 0.029270 | up |
| 20 | P01008 | SERPINC1 | 0.062919 | 0.127755 | 2.030457 | 0.049288 | up |
| 21 | P01011 | SERPINA3 | 0.040512 | 0.194492 | 4.800838 | 0.021317 | up |
| 22 | P01023 | A2M | 0.116995 | 0.335743 | 2.869711 | 0.018220 | up |
| 23 | P01042 | KNG1 | 0.033701 | 0.096539 | 2.864629 | 0.003300 | up |
| 24 | P01344 | IGF2 | 0.001325 | 0.004820 | 3.636994 | 0.005331 | up |
| 25 | P02749 | APOH | 0.005502 | 0.014589 | 2.651273 | 0.002187 | up |
| 26 | P02753 | RBP4 | 0.003628 | 0.015696 | 4.326167 | 0.006896 | up |
| 27 | P02768 | ALB | 3.587790 | 6.485061 | 1.807536 | 0.012106 | up |
| 28 | P02771 | AFP | 0.033103 | 0.104984 | 3.171388 | 0.008318 | up |
| 29 | P04004 | VTN | 0.107199 | 0.457744 | 4.270051 | 0.009082 | up |
| 30 | P04040 | CAT | 0.025786 | 0.039060 | 1.514792 | 0.017935 | up |
| 31 | P04066 | FUCA1 | 0.008048 | 0.013911 | 1.728641 | 0.013836 | up |
| 32 | P04083 | ANXA1 | 0.137448 | 0.206255 | 1.500606 | 0.038481 | up |
| 33 | P04183 | TK1 | 0.007983 | 0.012319 | 1.543268 | 0.015682 | up |
| 34 | P05362 | ICAM1 | 0.017217 | 0.029044 | 1.686997 | 0.028853 | up |
| 35 | P05546 | SERPIND1 | 0.007393 | 0.019860 | 2.686200 | 0.049547 | up |
| 36 | P06396 | GSN | 0.028698 | 0.049552 | 1.726680 | 0.012096 | up |
| 37 | P07602 | PSAP | 0.044644 | 0.069952 | 1.566898 | 0.022518 | up |
| 38 | P09110 | ACAA1 | 0.000572 | 0.002868 | 5.013533 | 0.001917 | up |
| 39 | P10301 | RRAS | 0.050332 | 0.025853 | 0.513643 | 0.009982 | down |
| 40 | P10321 | HLA-C | 0.072055 | 0.011980 | 0.166260 | 0.034682 | down |
| 41 | P11766 | ADH5 | 0.033972 | 0.056624 | 1.666764 | 0.005881 | up |
| 42 | P12259 | F5 | 0.030226 | 0.102589 | 3.394121 | 0.006104 | up |
| 43 | P12429 | ANXA3 | 0.099613 | 0.158000 | 1.586134 | 0.011353 | up |
| 44 | P14866 | HNRNPL | 0.024460 | 0.014711 | 0.601426 | 0.017417 | down |
| 45 | P17612;P22694 | PRKACA;PRKACB | 0.010291 | 0.003340 | 0.324575 | 0.036959 | down |
| 46 | P17844 | DDX5 | 0.034229 | 0.012920 | 0.377454 | 0.000677 | down |
| 47 | P18621 | RPL17 | 0.100050 | 0.027534 | 0.275206 | 0.042814 | down |
| 48 | P19823 | ITIH2 | 0.016711 | 0.035563 | 2.128154 | 0.021539 | up |
| 49 | P20290 | BTF3 | 0.016660 | 0.006639 | 0.398472 | 0.000901 | down |
| 50 | P20674 | COX5A | 0.043360 | 0.023350 | 0.538517 | 0.015363 | down |
| 51 | P21926 | CD9 | 0.008732 | 0.031879 | 3.650833 | 0.012247 | up |
| 52 | P22087 | FBL | 0.050277 | 0.031083 | 0.618226 | 0.048553 | down |
| 53 | P22352 | GPX3 | 0.004592 | 0.014650 | 3.190474 | 0.007173 | up |
| 54 | P22676 | CALB2 | 0.008792 | 0.016682 | 1.897411 | 0.002996 | up |
| 55 | P23142 | FBLN1 | 0.007902 | 0.018225 | 2.306322 | 0.040762 | up |
| 56 | P23396 | RPS3 | 0.105517 | 0.067414 | 0.638892 | 0.046669 | down |
| 57 | P26358 | DNMT1 | 0.001496 | 0.000399 | 0.266991 | 0.006719 | down |
| 58 | P27701 | CD82 | 0.008948 | 0.021449 | 2.397125 | 0.036975 | up |
| 59 | P28062 | PSMB8 | 0.008605 | 0.014552 | 1.691027 | 0.036075 | up |
| 60 | P28300 | LOX | 0.001941 | 0.004082 | 2.102979 | 0.003193 | up |
| 61 | P29034 | S100A2 | 0.003003 | 0.027363 | 9.110767 | 0.001768 | up |
| 62 | P31040 | SDHA | 0.028108 | 0.018746 | 0.666925 | 0.024586 | down |
| 63 | P35268 | RPL22 | 0.080240 | 0.018004 | 0.224375 | 0.016118 | down |
| 64 | P36955 | SERPINF1 | 0.003656 | 0.011583 | 3.167932 | 0.038148 | up |
| 65 | P39019 | RPS19 | 0.050043 | 0.023232 | 0.464246 | 0.042770 | down |
| 66 | P39023 | RPL3 | 0.045103 | 0.020780 | 0.460725 | 0.009610 | down |
| 67 | P39748 | FEN1 | 0.012035 | 0.005381 | 0.447060 | 0.026789 | down |
| 68 | P40429 | RPL13A | 0.073413 | 0.045787 | 0.623692 | 0.024161 | down |
| 69 | P42166 | TMPO | 0.057763 | 0.034222 | 0.592448 | 0.001366 | down |
| 70 | P42766 | RPL35 | 0.028048 | 0.004150 | 0.147946 | 0.032477 | down |
| 71 | P46776 | RPL27A | 0.054667 | 0.015885 | 0.290573 | 0.018898 | down |
| 72 | P46777 | RPL5 | 0.075811 | 0.035418 | 0.467182 | 0.008455 | down |
| 73 | P46783 | RPS10 | 0.041899 | 0.026421 | 0.630573 | 0.049260 | down |
| 74 | P48960 | ADGRE5 | 0.017300 | 0.028453 | 1.644673 | 0.044985 | up |
| 75 | P49589 | CARS1 | 0.019442 | 0.032197 | 1.656021 | 0.001029 | up |
| 76 | P49720 | PSMB3 | 0.021980 | 0.033726 | 1.534425 | 0.008349 | up |
| 77 | P49721 | PSMB2 | 0.011029 | 0.005632 | 0.510602 | 0.049420 | down |
| 78 | P49903 | SEPHS1 | 0.001960 | 0.005148 | 2.626404 | 0.002184 | up |
| 79 | P50914 | RPL14 | 0.035653 | 0.008491 | 0.238157 | 0.014473 | down |
| 80 | P51884 | LUM | 0.001384 | 0.005793 | 4.186575 | 0.006115 | up |
| 81 | P54687 | BCAT1 | 0.003180 | 0.008301 | 2.610248 | 0.042146 | up |
| 82 | P55854;P61956;Q6EEV6 | SUMO2;SUMO3;SUMO4 | 0.066354 | 0.027854 | 0.419774 | 0.032706 | down |
| 83 | P55884 | EIF3B | 0.080981 | 0.050999 | 0.629766 | 0.007843 | down |
| 84 | P55957 | BID | 0.002093 | 0.005060 | 2.417925 | 0.023547 | up |
| 85 | P56385 | ATP5ME | 0.007793 | 0.017299 | 2.219925 | 0.041518 | up |
| 86 | P60228 | EIF3E | 0.052036 | 0.033647 | 0.646610 | 0.004188 | down |
| 87 | P60842 | EIF4A1 | 0.131909 | 0.070944 | 0.537825 | 0.006418 | down |
| 88 | P61026 | RAB10 | 0.107759 | 0.059657 | 0.553617 | 0.018108 | down |
| 89 | P61289 | PSME3 | 0.011657 | 0.018351 | 1.574282 | 0.047064 | up |
| 90 | P61353 | RPL27 | 0.059112 | 0.021144 | 0.357696 | 0.008187 | down |
| 91 | P61457 | PCBD1 | 0.010893 | 0.020735 | 1.903532 | 0.039775 | up |
| 92 | P61970 | NUTF2 | 0.006977 | 0.011802 | 1.691641 | 0.006801 | up |
| 93 | P62241 | RPS8 | 0.084813 | 0.041643 | 0.490996 | 0.022632 | down |
| 94 | P62263 | RPS14 | 0.080821 | 0.043968 | 0.544023 | 0.016553 | down |
| 95 | P62330 | ARF6 | 0.015750 | 0.009942 | 0.631235 | 0.002782 | down |
| 96 | P62750 | RPL23A | 0.079234 | 0.052459 | 0.662078 | 0.017198 | down |
| 97 | P62760;Q9UM19 | HPCAL4;VSNL1 | 0.004201 | 0.043656 | 10.391637 | 0.004314 | up |
| 98 | P62805 | H4C1 | 0.634371 | 0.112941 | 0.178036 | 0.044164 | down |
| 99 | P62834 | RAP1A | 0.028145 | 0.016159 | 0.574125 | 0.015198 | down |
| 100 | P62851 | RPS25 | 0.094851 | 0.047743 | 0.503350 | 0.040481 | down |
| 101 | P62873 | GNB1 | 0.008401 | 0.004530 | 0.539283 | 0.037158 | down |
| 102 | P67809 | YBX1 | 0.050357 | 0.029457 | 0.584957 | 0.020831 | down |
| 103 | P80303 | NUCB2 | 0.005945 | 0.011454 | 1.926785 | 0.001266 | up |
| 104 | Q00325 | SLC25A3 | 0.092244 | 0.050804 | 0.550759 | 0.043274 | down |
| 105 | Q00535 | CDK5 | 0.000823 | 0.002029 | 2.464311 | 0.011374 | up |
| 106 | Q00839 | HNRNPU | 0.122447 | 0.067081 | 0.547839 | 0.009450 | down |
| 107 | Q07020 | RPL18 | 0.070878 | 0.037350 | 0.526964 | 0.014350 | down |
| 108 | Q08380 | LGALS3BP | 0.011822 | 0.023767 | 2.010366 | 0.024956 | up |
| 109 | Q08431 | MFGE8 | 0.002722 | 0.010384 | 3.814550 | 0.005951 | up |
| 110 | Q08722 | CD47 | 0.023457 | 0.042301 | 1.803362 | 0.014773 | up |
| 111 | Q12849 | GRSF1 | 0.049439 | 0.017444 | 0.352843 | 0.027980 | down |
| 112 | Q12913 | PTPRJ | 0.000797 | 0.004659 | 5.841860 | 0.027968 | up |
| 113 | Q13148 | TARDBP | 0.010693 | 0.007051 | 0.659381 | 0.034383 | down |
| 114 | Q13162 | PRDX4 | 0.041371 | 0.026571 | 0.642278 | 0.022287 | down |
| 115 | Q13263 | TRIM28 | 0.032641 | 0.010200 | 0.312491 | 0.000011 | down |
| 116 | Q13283 | G3BP1 | 0.026296 | 0.013436 | 0.510951 | 0.006441 | down |
| 117 | Q13310 | PABPC4 | 0.183926 | 0.077490 | 0.421311 | 0.027002 | down |
| 118 | Q13952 | NFYC | 0.000130 | 0.000302 | 2.319639 | 0.024656 | up |
| 119 | Q14011 | CIRBP | 0.008919 | 0.004594 | 0.515102 | 0.027335 | down |
| 120 | Q14118 | DAG1 | 0.003683 | 0.005754 | 1.562084 | 0.000890 | up |
| 121 | Q14444 | CAPRIN1 | 0.022527 | 0.011902 | 0.528339 | 0.036496 | down |
| 122 | Q14764 | MVP | 0.034820 | 0.052451 | 1.506367 | 0.008431 | up |
| 123 | Q14978 | NOLC1 | 0.008111 | 0.002994 | 0.369150 | 0.045635 | down |
| 124 | Q15003 | NCAPH | 0.007657 | 0.004052 | 0.529210 | 0.018472 | down |
| 125 | Q15121 | PEA15 | 0.009969 | 0.016261 | 1.631095 | 0.048804 | up |
| 126 | Q15365 | PCBP1 | 0.054183 | 0.029113 | 0.537296 | 0.001826 | down |
| 127 | Q15366 | PCBP2 | 0.073813 | 0.046547 | 0.630610 | 0.045271 | down |
| 128 | Q15717 | ELAVL1 | 0.034236 | 0.016606 | 0.485032 | 0.017171 | down |
| 129 | Q15758 | SLC1A5 | 0.021672 | 0.044464 | 2.051626 | 0.007111 | up |
| 130 | Q16186 | ADRM1 | 0.012405 | 0.004336 | 0.349548 | 0.023624 | down |
| 131 | Q16222 | UAP1 | 0.014224 | 0.006575 | 0.462239 | 0.022921 | down |
| 132 | Q16555 | DPYSL2 | 0.013762 | 0.022319 | 1.621761 | 0.015267 | up |
| 133 | Q16777;Q6FI13 | H2AC18;H2AC20 | 0.174199 | 0.043875 | 0.251864 | 0.024229 | down |
| 134 | Q5JTV8 | TOR1AIP1 | 0.009925 | 0.006066 | 0.611188 | 0.002298 | down |
| 135 | Q63HN8 | RNF213 | 0.000860 | 0.001301 | 1.512048 | 0.003667 | up |
| 136 | Q7Z417 | NUFIP2 | 0.004170 | 0.001499 | 0.359408 | 0.036420 | down |
| 137 | Q8IWA5 | SLC44A2 | 0.001763 | 0.003506 | 1.988038 | 0.014544 | up |
| 138 | Q8IY17 | PNPLA6 | 0.000772 | 0.002492 | 3.228879 | 0.013891 | up |
| 139 | Q8NBJ7 | SUMF2 | 0.018411 | 0.006475 | 0.351690 | 0.049130 | down |
| 140 | Q8NCW5 | NAXE | 0.001249 | 0.001994 | 1.596636 | 0.017119 | up |
| 141 | Q8TDN6 | BRIX1 | 0.003888 | 0.000529 | 0.136022 | 0.006272 | down |
| 142 | Q92520 | FAM3C | 0.014127 | 0.001502 | 0.106306 | 0.038855 | down |
| 143 | Q92841 | DDX17 | 0.055921 | 0.036700 | 0.656278 | 0.004424 | down |
| 144 | Q92945 | KHSRP | 0.053472 | 0.030901 | 0.577891 | 0.031240 | down |
| 145 | Q969S9 | GFM2 | 0.028915 | 0.055441 | 1.917359 | 0.004008 | up |
| 146 | Q96AG4 | LRRC59 | 0.116734 | 0.050304 | 0.430931 | 0.006648 | down |
| 147 | Q96BN8 | OTULIN | 0.002078 | 0.000805 | 0.387455 | 0.041549 | down |
| 148 | Q96GQ7 | DDX27 | 0.007713 | 0.001055 | 0.136770 | 0.030657 | down |
| 149 | Q96IY4 | CPB2 | 0.001578 | 0.011826 | 7.496031 | 0.002029 | up |
| 150 | Q96P70 | IPO9 | 0.001553 | 0.002747 | 1.768865 | 0.000560 | up |
| 151 | Q99729 | HNRNPAB | 0.067669 | 0.042837 | 0.633032 | 0.003802 | down |
| 152 | Q9H0B6 | KLC2 | 0.000602 | 0.004304 | 7.146491 | 0.002463 | up |
| 153 | Q9H853 | TUBA4B | 0.212555 | 0.050841 | 0.239190 | 0.015068 | down |
| 154 | Q9NPD3 | EXOSC4 | 0.006518 | 0.009795 | 1.502755 | 0.026859 | up |
| 155 | Q9NR45 | NANS | 0.019404 | 0.030487 | 1.571164 | 0.000732 | up |
| 156 | Q9NRP0 | OSTC | 0.004785 | 0.009371 | 1.958392 | 0.037446 | up |
| 157 | Q9NVA2 | SEPTIN11 | 0.024094 | 0.037125 | 1.540860 | 0.042762 | up |
| 158 | Q9NVI7 | ATAD3A | 0.007314 | 0.002097 | 0.286733 | 0.045473 | down |
| 159 | Q9NVP1 | DDX18 | 0.030908 | 0.006229 | 0.201542 | 0.006683 | down |
| 160 | Q9NX14 | NDUFB11 | 0.008594 | 0.003714 | 0.432108 | 0.011840 | down |
| 161 | Q9NX40 | OCIAD1 | 0.040295 | 0.063870 | 1.585067 | 0.048244 | up |
| 162 | Q9NZL4 | HSPBP1 | 0.003077 | 0.005103 | 1.658616 | 0.004771 | up |
| 163 | Q9NZM1 | MYOF | 0.050500 | 0.075844 | 1.501856 | 0.031113 | up |
| 164 | Q9UG63 | ABCF2 | 0.022142 | 0.013091 | 0.591243 | 0.013150 | down |
| 165 | Q9UHA4 | LAMTOR3 | 0.002041 | 0.005490 | 2.689885 | 0.033260 | up |
| 166 | Q9UIJ7 | AK3 | 0.005338 | 0.013088 | 2.451616 | 0.045547 | up |
| 167 | Q9UJ70 | NAGK | 0.004576 | 0.007746 | 1.692748 | 0.025069 | up |
| 168 | Q9UJX5 | ANAPC4 | 0.000173 | 0.000441 | 2.541416 | 0.004345 | up |
| 169 | Q9UJZ1 | STOML2 | 0.013185 | 0.021235 | 1.610499 | 0.037931 | up |
| 170 | Q9UKM9 | RALY | 0.033703 | 0.012261 | 0.363782 | 0.025948 | down |
| 171 | Q9UL25 | RAB21 | 0.002807 | 0.007610 | 2.711370 | 0.034902 | up |
| 172 | Q9ULH1 | ASAP1 | 0.001312 | 0.002434 | 1.854556 | 0.021283 | up |
| 173 | Q9UM54 | MYO6 | 0.005012 | 0.021725 | 4.334275 | 0.012130 | up |
| 174 | Q9UMS4 | PRPF19 | 0.014177 | 0.007434 | 0.524354 | 0.005926 | down |
| 175 | Q9UNI6 | DUSP12 | 0.002579 | 0.003932 | 1.524535 | 0.002539 | up |
| 176 | Q9Y277 | VDAC3 | 0.008840 | 0.005791 | 0.655069 | 0.007852 | down |
| 177 | Q9Y316 | MEMO1 | 0.000463 | 0.001324 | 2.858936 | 0.018954 | up |
| 178 | Q9Y3Z3 | SAMHD1 | 0.012042 | 0.024003 | 1.993327 | 0.038204 | up |
| 179 | Q9Y5J9 | TIMM8B | 0.006933 | 0.004437 | 0.639994 | 0.008322 | down |
| 180 | Q9Y617 | PSAT1 | 0.058667 | 0.102363 | 1.744813 | 0.016906 | up |

DEPs were defined as proteins with *p* < 0.05, FC > 1.5 or < 0.67.

**Table S5** Primer sequences used for RT-qPCR validation

| Gene |  | Primer sequence (5’→3’) |
| --- | --- | --- |
| ACAA1 | F | TCGCCCAGTTTCTGAGTGAC |
| R | AGGTATCCTGCTTCTCCCGT |
| ACSL3 | F | GCCGAGTGGATGAGTGTGC |
| R | ATGGCTGGACCTTAGAGTG |
| HADHA | F | CTGCCCAAAATGGTGGGTGT |
| R | GGAGGTTTTAGTCCTGGTCCC |
| HADHB | F | CTGTCCAGACCAAAACGAAGAA |
| R | CGATGCAACAAACCCGTAAGC |
| GAPDH | F | GCACCGTCAAGGCTGAGAAC |
| R | GCCTTCTCCATGGTGGTGAA |

**Table S6** Western blot composition of solution

| Component | Electrophoresis Buffer (g) | Transfer Buffer (g) |
| --- | --- | --- |
| Tris | 3.03 | 3.03 |
| Glycine | 17.8 | 14.4 |
| SDS | 1 | 0 |

**Table S7** Antibody dilution ratio of western blot

| Antibody | Source | Species | Dilution ratio (primary antibody) |
| --- | --- | --- | --- |
| ACAA1 | Proteintech | Rabbit | 1:1000 |
| ACSL3 | Proteintech | Rabbit | 1:1000 |
| CAT | Proteintech | Rabbit | 1:1000 |
| GAPDH | Proteintech | Rabbit | 1:10000 |

All primary antibodies were detected using goat anti-rabbit IgG (H+L), HRP-conjugated secondary antibody (Proteintech), at a dilution of 1:10000.
